# Supplementary material for: Adipocyte Glucocorticoid Receptor Deficiency Attenuates Aging- and HFD-Induced Obesity and Impairs the Feeding-Fasting Transition
Source: Oxford University Press journal article supplement (doi:10.2337/db16-0381), 2016-09-20
Supplement: db160381supplementarydata2.xlsx [file db160381supplementarydata2.xlsx]

## Sheet: per-metabolite
																						cut off MVA		15	15	15	15			0.15	0.15	0.2	0.3	0.3	0.3
																						cut off exclusion		20	20	20	20			0.3	0.3	0.75	0.75	0.5	0.75
PeakScout_ID	Statistics	Metabolite_Name	Metabolite_Class	1_ratio_GRfed_vs_Cfed	1_pvalue_GRfed_vs_Cfed	1_pvalue-category_GRfed_vs_Cfed	2_ratio_C48_vs_Cfed	2_pvalue_C48_vs_Cfed	2_pvalue-category_C48_vs_Cfed	3_ratio_GR48_vs_Grfed	3_pvalue_GR48_vs_Grfed	3_pvalue-category_GR48_vs_Grfed	4_ratio_GR48_vs_C48	4_pvalue_GR48_vs_C48	4_pvalue-category_GR48_vs_C48	5_ratio_GRHFD_vs_CHFD	5_pvalue_GRHFD_vs_CHFD	5_pvalue-category_GRHFD_vs_CHFD	HMDB_ID	HMDB_mapping	precursor_mass_m-z	RT_standard	Scan_polarity	ppm_median_QC	ppm_median_samples	ppm_MIN-MAX_QC	ppm_MIN-MAX_samples	Rt_median_QC	Rt_median_samples	Rt_RSD_QC	Rt_RSD_samples	Bl-load_QC_medians	QC_RSD	Data_missing_QC	Data_missing_samples	PC1_Cfed_GRfed_C48_GR48_157metabolites	PC2_Cfed_GRfed_C48_GR48_157metabolites	PC3_Cfed_GRfed_C48_GR48_157metabolites	PC4_Cfed_GRfed_C48_GR48_157metabolites	PC5_Cfed_GRfed_C48_GR48_157metabolites	PC6_Cfed_GRfed_C48_GR48_157metabolites	PC1_CHFD_GRHFD_157metabolites	PC2_CHFD_GRHFD_157metabolites	PC3_CHFD_GRHFD_157metabolites	PC4_CHFD_GRHFD_157metabolites	PC5_CHFD_GRHFD_157metabolites	PC6_CHFD_GRHFD_157metabolites	1_pvalue-adjBH_GRfed_vs_Cfed	1_tvalue_GRfed_vs_Cfed
3	MVA_UVA	1-Methylhistidine	Amino acids, peptides and metabolites	0.782767	0.201751	non-sig	2.3452	0.00404187	p<0.01	3.87405	2.23084e-05	p<0.01	1.29306	0.306793	non-sig	1.09844	0.687029	non-sig	HMDB00001	most likley	170.092	11.91	1	5.28812	5.03338	1.83443	1.83298	12.2112	12.2866	0.00650089	0.0100302	0.00304462	0.133213	0	0	-0.0827671	0.117911	-0.0415229	-0.0130686	0.10782	-0.00732347	-0.0371953	-0.121063	0.00553786	0.0608239	-0.015022	-0.139001	0.311343	-1.32499
5	MVA_UVA	2-Ketobutyric acid	Amino acids, peptides and metabolites	0.744021	0.115862	non-sig	0.436448	0.00273999	p<0.01	1.16126	0.285627	non-sig	1.97962	0.00919646	p<0.01	0.918081	0.485513	non-sig	HMDB00005	most likley	101.024	10.4	0	9.70561	9.59046	1.72252	1.48189	9.57786	9.62361	0.0168831	0.0137677	0.0276246	0.0913312	0	0	-0.0564669	-0.0818999	-0.127894	-0.0245083	-0.0207572	-0.0771848	-0.0177221	-0.0321752	-0.181723	-0.0491264	0.142819	-0.0917604	0.235719	-1.65205
9	MVA_UVA	3-methyl-2-oxovaleric acid	Amino acids, peptides and metabolites	0.812687	0.195632	non-sig	2.20895	0.00278834	p<0.01	2.83342	8.2603e-05	p<0.01	1.04243	0.806113	non-sig	0.887313	0.729631	non-sig	HMDB00491	most likley	129.056	9.3	0	12.8121	12.608	1.77479	1.69858	9.56807	9.64082	0.0105234	0.0156049	0.00236186	0.0517988	0	0	-0.0691387	0.122861	-0.0613043	0.063781	0.0394155	-0.0445618	0.00375321	-0.162229	0.0677507	-0.0213965	-0.0544419	0.0257244	0.311343	-1.34404
19	MVA_UVA	Acetylglycine	Amino acids, peptides and metabolites	0.442968	0.00180904	p<0.01	2.71701	0.000298154	p<0.01	6.74261	1.00098e-07	p<0.01	1.09928	0.700908	non-sig	0.792936	0.373029	non-sig	HMDB00532	most likley	118.05	12.1	1	2.69012	2.34132	2.0796	2.41164	12.9195	12.9832	0.00779495	0.020627	0.000320095	0.0805193	0	0.0263158	-0.0909995	0.121629	-0.0141018	-0.0176699	-0.00158651	0.0576688	-0.0308413	-0.166747	-0.0229667	-0.0216259	-0.0199714	-0.0157861	0.122935	-3.65558
24	MVA_UVA	ADMA	Amino acids, peptides and metabolites	0.681427	0.126676	non-sig	0.732639	0.105111	non-sig	1.43353	0.149863	non-sig	1.33332	0.124959	non-sig	1.1391	0.581222	non-sig	HMDB01539	most likley	203.15	11.37	1	5.6058	5.30281	1.63956	2.42045	10.9459	10.9086	0.0148213	0.0150693	0.0588516	0.0802339	0	0	-0.0840311	-0.044752	-0.0139519	-0.121759	-0.00344701	-0.035473	0.0258072	-0.154392	0.0309717	0.0489352	-0.123081	-0.0729283	0.238528	-1.60147
332	MVA_UVA	Alanine	Amino acids, peptides and metabolites	0.879529	0.686034	non-sig	0.467685	0.00250452	p<0.01	0.762976	0.189737	non-sig	1.43485	0.0997237	p<0.1	0.578614	0.0929759	p<0.1	HMDB00161	most likley	88.0404	11.04	0	-0.400091	-0.547549	2.26826	2.69021	10.8755	10.8942	0.0104556	0.00910716	0.027397	0.141375	0	0	0.0048232	-0.111071	-0.104869	-0.028293	-0.0195959	0.0147304	-0.0371438	-0.140699	-0.0191455	-0.0660223	-0.131989	0.0796108	0.749555	-0.410848
29	MVA_UVA	Alpha-Aminobutyric acid	Amino acids, peptides and metabolites	0.821493	0.204181	non-sig	1.90417	0.000302732	p<0.01	2.20318	2.50161e-05	p<0.01	0.950491	0.873072	non-sig	1.19486	0.247995	non-sig	HMDB00452	most likley	104.071	9.7	1	0.29757	0.389105	1.93864	2.87374	9.90263	9.97343	0.00952347	0.0176468	0.00841257	0.106069	0	0	-0.0654416	0.136443	-0.0181046	-0.00242589	-0.0244686	-0.0045609	0.00152302	-0.0777855	0.132474	0.0456527	0.062707	-0.160796	0.311343	-1.31755
33	MVA_UVA	Anserine	Amino acids, peptides and metabolites	0.803507	0.448466	non-sig	0.466344	0.00825451	p<0.01	0.766639	0.334921	non-sig	1.32091	0.245153	non-sig	1.47715	0.354296	non-sig	HMDB00194	most likley	241.13	12.8	1	6.10081	5.94785	2.11176	8.98583	12.2085	12.1884	0.00921375	0.0111911	0.062305	0.275565	0	0.131579	-0.0222184	-0.105898	-0.0872948	-0.000291195	0.149798	0.135246	-0.0264168	-0.0446061	0.0735841	0.180368	-0.0997869	0.00482275	0.547437	-0.774889
35	MVA_UVA	Arginine	Amino acids, peptides and metabolites	0.802953	0.091607	p<0.1	0.594704	0.000830332	p<0.01	1.13821	0.292294	non-sig	1.53678	0.0039128	p<0.01	0.975911	0.724683	non-sig	HMDB00517	most likley	175.119	12.05	1	4.96782	4.75142	1.78682	2.04048	11.763	11.7835	0.0121088	0.0137123	0.007744	0.020348	0	0	-0.0650617	-0.100125	-0.0808159	-0.132203	0.0435472	-0.0657754	-0.03497	-0.115848	-0.0807072	0.143321	-0.0981434	0.00117037	0.20464	-1.78212
38	MVA_UVA	Aspartic acid	Amino acids, peptides and metabolites	0.17411	0.0435112	p<0.05	0.191781	0.104139	non-sig	1.67699	0.808419	non-sig	1.52248	0.833162	non-sig	1.13569	0.126834	non-sig	HMDB00191	most likley	134.045	14.29	1	4.17239	4.09626	1.70816	1.90022	15.1813	15.2805	0.00653768	0.0185984	0.00284132	0.0325092	0	0	-0.0317092	-0.0607429	0.0547529	-0.101336	-0.211422	0.134135	0.0280016	-0.0233825	-0.133994	0.0940324	-0.0327081	-0.187165	0.141234	-2.17143
55	MVA_UVA	Citrulline	Amino acids, peptides and metabolites	0.838364	0.271663	non-sig	0.915892	0.483161	non-sig	1.25219	0.253912	non-sig	1.1462	0.456755	non-sig	0.880647	0.363984	non-sig	HMDB00904	most likley	174.088	11.43	0	7.94828	8.07963	1.59465	1.7811	11.4667	11.4567	0.00665284	0.00800742	0.000373415	0.0695833	0	0	-0.0783044	-0.0179277	-0.0709757	-0.0295778	0.122163	0.0380665	-0.050464	-0.149125	-0.081198	0.0406369	0.0302433	-0.0697907	0.375659	-1.13402
60	MVA_UVA	Creatine	Amino acids, peptides and metabolites	0.769341	0.301758	non-sig	0.860214	0.518118	non-sig	1.50014	0.0481222	p<0.05	1.34167	0.103241	non-sig	0.817	0.12424	non-sig	HMDB00064	most likley	132.077	11.5	1	2.01249	2.14703	5.0471	4.71472	9.90468	9.95457	0.00901494	0.0198667	0.000332169	0.106497	0	0	-0.0401851	0.0210254	-0.164022	-0.0011122	-0.0025322	0.0110324	-0.0537377	-0.0656841	0.0640046	-0.117541	-0.173804	0.0462609	0.396005	-1.06318
61	MVA_UVA	Creatinine	Amino acids, peptides and metabolites	0.596847	0.00530442	p<0.01	1.10532	0.717297	non-sig	2.24652	0.000175116	p<0.01	1.21307	0.25682	non-sig	1.00916	0.96793	non-sig	HMDB00562	most likley	114.066	6.03	1	2.39576	2.23041	1.66464	1.93533	6.34154	6.4721	0.0101234	0.0211351	0.000376576	0.0322454	0	0	-0.113697	0.0534033	-0.0673745	-0.0448619	-0.0296881	0.0438904	-0.0222727	-0.140548	0.0266991	-0.0196258	-0.0048099	-0.189212	0.122935	-3.16967
89	MVA_UVA	Glutamic acid	Amino acids, peptides and metabolites	0.553555	0.0348345	p<0.05	0.451869	0.00793707	p<0.01	1.00203	0.703349	non-sig	1.22752	0.29029	non-sig	0.619718	0.103867	non-sig	HMDB00148	most likley	148.06	14.34	1	5.18097	4.97838	1.66885	1.87502	15.3201	15.4305	0.00759704	0.0170097	0.000294482	0.0477043	0	0	-0.0759895	-0.0997001	0.0295005	-0.131689	0.00231646	0.104187	-0.0314178	-0.103131	0.0470532	-0.041469	-0.022704	0.0445653	0.130719	-2.28256
90	MVA_UVA	Glutamine	Amino acids, peptides and metabolites	0.812068	0.129739	non-sig	0.868024	0.293793	non-sig	1.34943	0.0547346	p<0.1	1.26244	0.138989	non-sig	0.729193	0.199408	non-sig	HMDB00641	most likley	147.076	11.51	1	4.95808	4.76035	1.68067	1.88598	12.05	11.5736	0.0101044	0.0245153	0.000383709	0.0373865	0	0	-0.101532	-0.0233426	-0.103916	-0.0574009	-0.0602282	0.0299198	-0.056453	-0.161623	-0.00987948	0.0120623	-0.0458511	0.0154052	0.241725	-1.58781
96	MVA_UVA	Glycine	Amino acids, peptides and metabolites	0.693969	0.0356525	p<0.05	1.49502	0.0369182	p<0.05	2.42673	4.4711e-05	p<0.01	1.12646	0.425397	non-sig	0.967864	0.734483	non-sig	HMDB00123	most likley	76.0393	13	1	-2.73181	-2.83455	1.823	1.93888	12.901	11.5867	0.00657095	0.0630589	0.0619191	0.0616917	0	0	-0.0999942	0.0967852	-0.0354206	-0.00112481	0.00102106	0.0110086	0.00112011	-0.126165	0.0740824	0.00604857	-0.1875	-0.0685372	0.130719	-2.27105
113	MVA_UVA	Histidine	Amino acids, peptides and metabolites	0.735738	0.0924925	p<0.1	0.846388	0.274409	non-sig	1.38787	0.0839828	p<0.1	1.20643	0.253486	non-sig	0.906751	0.45034	non-sig	HMDB00177	most likley	156.077	11.82	1	4.86408	4.70671	1.93153	1.8926	11.9278	11.9733	0.00670688	0.00938144	0.00147764	0.0218369	0	0	-0.103733	-0.02869	-0.108695	-0.0260533	-0.0544069	0.0309575	-0.0563404	-0.153248	-0.0222157	0.0325193	-0.0323901	-0.0307296	0.20464	-1.77687
126	MVA_UVA	Isoleucine, Leucine	Amino acids, peptides and metabolites	0.760242	0.0886405	p<0.1	0.938569	0.602896	non-sig	1.56084	0.014554	p<0.05	1.26428	0.169091	non-sig	0.98569	0.782914	non-sig	HMDB00172, HMDB00687	exemplaric	132.102	9.24	1	4.31721	4.12883	1.67649	2.07547	9.31133	9.31844	0.00869723	0.00956073	6.47236e-05	0.0222701	0	0	-0.12088	0.00238044	-0.030077	-0.0744649	-0.0128456	-0.0649431	0.00195916	-0.126883	-0.0480484	0.132502	0.0918999	0.121463	0.20464	-1.80002
123	MVA_UVA	Kynurenine	Amino acids, peptides and metabolites	0.943096	0.674719	non-sig	1.43984	0.423069	non-sig	1.63457	0.0686631	p<0.1	1.07065	0.498906	non-sig	1.05734	0.782695	non-sig	HMDB00684	most likley	209.092	9.51	1	6.21419	5.8987	1.82832	2.47147	9.73483	9.76851	0.00728968	0.0104138	0.00051511	0.0746902	0	0	-0.0505565	0.049794	-0.121714	0.0526813	-0.0387368	-0.0894444	0.0292235	-0.0895838	0.172019	-0.082529	0.0301061	-0.00964735	0.741771	-0.426615
125	MVA_UVA	L-Cystathionine	Amino acids, peptides and metabolites	0.686824	0.374175	non-sig	0.577982	0.057252	p<0.1	1.0343	0.977633	non-sig	1.22907	0.265805	non-sig	0.76861	0.612077	non-sig	HMDB00099	most likley	223.075	14.8	1	5.79929	5.62187	2.05662	4.22383	14.3807	14.3678	0.00696471	0.0085174	0.0190132	0.151651	0	0.0263158	-0.0132874	-0.0672808	-0.159571	0.030502	-0.0283355	0.0229669	0.0025966	-0.0443833	0.159963	-0.00245342	0.0575548	0.103491	0.466402	-0.91131
129	MVA_UVA	Lysine	Amino acids, peptides and metabolites	0.779771	0.0976527	p<0.1	0.547601	0.000494387	p<0.01	0.991316	0.999166	non-sig	1.41161	0.0227738	p<0.05	0.844291	0.209472	non-sig	HMDB00182	most likley	147.113	12.67	1	5.08905	4.92712	1.77378	1.97337	12.3889	12.4361	0.0111445	0.017205	0.0127275	0.0324931	0	0	-0.0473451	-0.119227	-0.104001	-0.0705015	0.0312866	0.0268419	-0.0688839	-0.124836	-0.0368796	0.085869	-0.0704904	0.0495693	0.213389	-1.74714
136	MVA_UVA	Methionine	Amino acids, peptides and metabolites	0.838421	0.205803	non-sig	1.08871	0.531034	non-sig	1.37079	0.0221862	p<0.05	1.05565	0.588224	non-sig	0.980373	0.743591	non-sig	HMDB00696	most likley	148.044	9.73	0	11.2283	11.1579	1.75154	2.47309	9.93485	9.99759	0.00822061	0.0121814	0	0.0520563	0	0	-0.082018	0.0528794	-0.106665	0.0779736	0.0290735	-0.0600215	-0.0575416	-0.0548625	-0.0565138	0.195182	-0.0174651	0.111981	0.311343	-1.31262
157	MVA_UVA	Ornithine	Amino acids, peptides and metabolites	0.853679	0.393051	non-sig	0.572989	0.00682687	p<0.01	1.08679	0.770626	non-sig	1.61917	0.0234825	p<0.05	0.813562	0.225632	non-sig	HMDB00214	most likley	133.097	12.81	1	4.13583	3.94181	1.75826	2.08816	12.6609	12.6185	0.01382	0.0161917	0.0180076	0.0326692	0	0	-0.0441562	-0.0965456	-0.0843801	-0.106942	0.042638	0.0675755	-0.056928	-0.149502	-0.0359271	0.0262121	-0.0627752	0.0262852	0.486503	-0.875093
176	MVA_UVA	Phenylalanin	Amino acids, peptides and metabolites	0.745091	0.0591369	p<0.1	0.901973	0.421851	non-sig	1.66919	0.00442851	p<0.01	1.37887	0.0542521	p<0.1	0.982135	0.775226	non-sig	HMDB00159	most likley	166.086	9.54	1	5.25134	5.0787	1.62603	2.2177	9.76558	9.78659	0.00890238	0.0113454	8.45363e-05	0.0385445	0	0	-0.108409	0.00982101	-0.106704	-0.0418169	-0.0320417	-0.0355964	-0.00821844	-0.0952665	0.00286547	0.134732	0.13475	0.143427	0.163551	-2.01459
183	MVA_UVA	Proline	Amino acids, peptides and metabolites	0.82698	0.21268	non-sig	0.599656	0.00632614	p<0.01	1.10807	0.501897	non-sig	1.52813	0.0231344	p<0.05	0.725571	0.176191	non-sig	HMDB00162	most likley	116.071	12.14	1	2.63799	2.4792	1.8304	2.0161	12.6522	12.6207	0.0117238	0.0167791	0.0176351	0.10506	0	0	-0.0486364	-0.0880511	-0.0990879	-0.105683	0.0587744	0.0740384	-0.076476	-0.128555	-0.025141	0.00086157	-0.087359	0.012753	0.315033	-1.29206
187	MVA_UVA	Pyroglutamic acid	Amino acids, peptides and metabolites	0.611374	0.0691963	p<0.1	0.644765	0.158165	non-sig	1.26597	0.226855	non-sig	1.20041	0.439082	non-sig	1.05972	0.975753	non-sig	HMDB00267	most likley	128.035	11.79	0	12.738	12.6735	1.77848	1.43419	12.9283	13.0016	0.00784201	0.0170753	0.00727428	0.0585929	0	0	-0.0532502	-0.045697	0.0471528	-0.144537	-0.214554	0.0761677	-0.0222731	-0.148188	-0.0144626	0.0660688	-0.0532497	-0.119515	0.175723	-1.93245
192	MVA_UVA	Serine	Amino acids, peptides and metabolites	0.816384	0.152456	non-sig	0.917816	0.399962	non-sig	1.37686	0.0448836	p<0.05	1.2247	0.144958	non-sig	0.916875	0.596721	non-sig	HMDB00187	most likley	106.05	11.82	1	1.96507	1.87913	1.72816	1.97457	11.9278	11.9141	0.00758584	0.00880454	0.000604094	0.0389514	0	0	-0.0766198	0.00276108	-0.146174	0.00707374	0.0152342	0.0129057	-0.0647223	-0.137436	0.0153018	0.0770699	-0.0915893	-0.0305981	0.264557	-1.49416
202	MVA_UVA	Taurine	Amino acids, peptides and metabolites	0.625886	0.0167024	p<0.05	0.888332	0.399469	non-sig	1.8464	0.00396298	p<0.01	1.30091	0.144142	non-sig	0.787643	0.219606	non-sig	HMDB00251	most likley	124.007	10.89	0	13.2995	13.1518	1.78707	1.57604	11.1378	11.1185	0.00879602	0.0113021	4.13028e-05	0.0496903	0	0	-0.10439	0.0166082	-0.0445201	-0.0926238	0.0663906	0.102505	-0.0137097	-0.120024	0.0704492	-0.100591	-0.0760557	-0.0267949	0.122935	-2.63813
208	MVA_UVA	Threonine	Amino acids, peptides and metabolites	0.926673	0.564039	non-sig	1.06831	0.891156	non-sig	1.44734	0.0175627	p<0.05	1.25545	0.0752797	p<0.1	0.798438	0.323943	non-sig	HMDB00167	most likley	120.066	11.44	1	2.85126	2.70338	1.93477	1.9381	11.418	11.4302	0.00912411	0.00729542	0.00115688	0.0611701	0	0	-0.0547798	0.0411056	-0.156201	-0.00423282	-0.0550528	-0.0694935	-0.0682828	-0.135363	-0.00884742	0.081502	-0.0803092	0.0189505	0.648278	-0.587694
215	MVA_UVA	Tryptophan	Amino acids, peptides and metabolites	0.924091	0.480814	non-sig	0.993782	0.884226	non-sig	1.34785	0.0834459	p<0.1	1.25333	0.223604	non-sig	1.07218	0.42841	non-sig	HMDB00929	most likley	205.097	9.68	1	5.72346	5.83746	2.00079	2.26467	9.90007	9.92119	0.00891297	0.0112748	2.15332e-05	0.0603441	0	0	-0.0681038	0.0205633	-0.114277	0.0299117	0.0789793	-0.0365893	0.016724	0.0251346	0.107314	0.128305	0.0707368	0.130862	0.56736	-0.719928
216	MVA_UVA	Tyrosine	Amino acids, peptides and metabolites	0.668683	0.0376569	p<0.05	0.610134	0.0203997	p<0.05	1.19347	0.287168	non-sig	1.308	0.179726	non-sig	0.889714	0.231477	non-sig	HMDB00158	most likley	180.067	10.78	0	7.54964	7.51412	1.72869	1.69453	10.9853	10.9783	0.00861844	0.00925782	0.000198647	0.0467936	0	0	-0.0871098	-0.068432	-0.118076	0.0152664	0.0818397	0.0290693	-0.0583266	-0.138442	-0.0721167	0.0882866	0.0110363	0.042882	0.130719	-2.24386
225	MVA_UVA	Valine	Amino acids, peptides and metabolites	0.729234	0.0297276	p<0.05	0.842287	0.222383	non-sig	1.27666	0.0807725	p<0.1	1.1053	0.460919	non-sig	0.983227	0.809838	non-sig	HMDB00883	most likley	118.086	9.13	1	3.00913	2.77989	1.69441	1.94752	9.0283	8.97776	0.0149078	0.0203073	0.00161528	0.0840244	0	0	-0.104042	-0.0335238	-0.0638057	-3.50444e-05	-0.139062	-0.0286673	-0.0819281	-0.0297808	0.0991041	0.00761177	-0.0280361	-0.123246	0.130719	-2.36065
1	MVA_UVA	1,5-Anhydrosorbitol	Carbohydrates and conjugates	0.759801	0.216761	non-sig	0.40962	0.000684602	p<0.01	0.925753	0.937806	non-sig	1.71717	0.0136711	p<0.05	0.943704	0.254832	non-sig	HMDB02712	most likley	161.046	10	0	9.78714	9.73565	1.86109	1.61498	9.61212	9.63531	0.00768327	0.00905412	0.00790314	0.0334929	0	0	-0.0167198	-0.101536	-0.141684	0.000712012	-0.0504786	-0.0807765	-0.0881924	-0.0386004	-0.0240571	-0.0689251	0.0993581	-0.174973	0.31708	-1.2801
85	MVA_UVA	Gluconic acid	Carbohydrates and conjugates	0.626105	0.0460011	p<0.05	0.745889	0.289849	non-sig	1.48433	0.110013	non-sig	1.24595	0.537661	non-sig	0.896797	0.607927	non-sig	HMDB00625	most likley	195.051	13.59	0	6.38194	6.2001	1.89565	1.79965	14.0356	14.1493	0.00841261	0.0115687	0.00109897	0.0618046	0	0	-0.0908297	-0.0240351	-0.0930885	-0.0426229	-0.0590796	0.135796	0.00320132	-0.122784	-0.0929547	-0.0915759	0.0249392	-0.107268	0.141234	-2.14331
88	UVA	Glucuronic acid	Carbohydrates and conjugates	0.616866	0.287867	non-sig	1.18012	0.975096	non-sig	1.31295	0.72156	non-sig	0.686296	0.491938	non-sig	1.14433	0.448778	non-sig	HMDB00127	most likley	193.035	14.1	0	6.26794	6.31893	1.459	1.73504	15.2017	15.2796	0.00704628	0.0166358	0.275878	0.109902	0	0													0.386003	-1.0952
93	UVA	Glyceric acid	Carbohydrates and conjugates	0.396145	0.00759717	p<0.01	0.503733	0.119159	non-sig	1.78068	0.0387862	p<0.05	1.40036	0.401089	non-sig	0.926046	0.917325	non-sig	HMDB00139	most likley	105.019	12.77	0	16.2286	16.168	1.86095	1.53864	13.6001	13.662	0.00775061	0.0152513	0.0170582	0.107797	0	0													0.122935	-3.00531
94	UVA	Glycerol	Carbohydrates and conjugates	0.598316	0.0172306	p<0.05	1.01199	0.967702	non-sig	2.00977	0.00280937	p<0.01	1.18823	0.438042	non-sig	0.722129	0.0405028	p<0.05	HMDB00131	most likley	91.0401	5.89	0	19.4799	19.3635	1.71833	1.70343	6.05762	6.13744	0.0146564	0.0190041	9.61122e-05	0.156692	0	0													0.122935	-2.62337
108	MVA_UVA	Hexose	Carbohydrates and conjugates	0.757375	0.203501	non-sig	0.402449	0.000601272	p<0.01	0.925681	0.957834	non-sig	1.74205	0.0124363	p<0.05	0.952375	0.293623	non-sig	HMDB00122, HMDB00169, HMDB00143	exemplaric	179.056	9.74	0	7.77866	7.70939	1.82295	1.60455	9.61985	9.65027	0.00689173	0.00827825	0.00411255	0.0219536	0	0	-0.019291	-0.102233	-0.140398	0.000625962	-0.0412275	-0.0815732	-0.0834984	-0.0621851	-0.0604612	-0.0539033	0.0641453	-0.178636	0.311343	-1.31962
116	UVA	Hydroxybutyric acid	Carbohydrates and conjugates	0.703862	0.00562345	p<0.01	0.343579	2.75991e-08	p<0.01	0.538527	5.54706e-05	p<0.01	1.10323	0.378385	non-sig	0.957362	0.798565	non-sig	HMDB00008	most likley	103.04	10.5	0	8.76811	8.56753	1.5451	1.52185	11.7663	12.3327	0.0184356	0.0414117	0.151336	0.428685	0	0													0.122935	-3.14304
135	MVA_UVA	Mannitol, Sorbitol	Carbohydrates and conjugates	0.742408	0.347236	non-sig	0.202251	0.000221336	p<0.01	0.500849	0.102686	non-sig	1.83847	0.0712175	p<0.1	0.947657	0.545965	non-sig	HMDB00765, HMDB00247	exemplaric	183.086	9.51	1	5.1013	4.83967	1.74048	1.93979	9.43583	9.49836	0.0122056	0.0118635	0.000571365	0.0667728	0	0	-0.021495	-0.142922	0.0257245	-0.129968	-0.014128	0.00313637	0.0227038	-0.00215055	0.0527919	-0.221641	0.0808528	0.0223443	0.442164	-0.965196
174	MVA_UVA	Pentose	Carbohydrates and conjugates	0.787344	0.255389	non-sig	0.428894	0.000837625	p<0.01	0.861161	0.68972	non-sig	1.58088	0.0262865	p<0.05	0.919678	0.0394032	p<0.05	HMDB00283	exemplaric	149.046	9.67	0	10.7816	10.6909	1.87477	2.85044	9.62924	9.67323	0.0126615	0.00928096	0.00882794	0.0565983	0	0	-0.0145836	-0.106143	-0.141514	0.0149765	-0.0456805	-0.0700428	-0.0819685	-0.0562076	-0.0621432	-0.121998	-1.49978e-05	-0.110779	0.355936	-1.17478
213	UVA	Trehalose	Carbohydrates and conjugates	0.706313	0.315467	non-sig	0.173202	0.000126172	p<0.01	0.698281	0.462679	non-sig	2.84757	0.00499421	p<0.01	0.641119	0.254331	non-sig	HMDB00975	most likley	341.109	9.5	0	1.29174	1.0338	2.51623	10.9148	9.62705	9.65638	0.0137734	0.0168895	0.0088557	0.300923	0	0.0263158													0.410571	-1.03434
82	MVA_UVA	Fumaric acid	Energy metabolism	0.711047	0.139268	non-sig	0.488692	0.00956979	p<0.01	1.08215	0.885753	non-sig	1.57453	0.151578	non-sig	0.731645	0.0517622	p<0.1	HMDB00134	most likley	115.004	18.2	0	14.4994	14.265	1.83582	1.91539	18.4038	18.5912	0.00914175	0.0318573	0.060806	0.104065	0	0	-0.0456055	-0.0942867	-0.138148	-0.00753463	-0.0361466	0.0512635	-0.0292726	-0.103031	-0.0786842	-0.139615	0.0913911	-0.00189852	0.251534	-1.54699
95	MVA_UVA	Glyceryl phosphate	Energy metabolism	0.616672	0.135478	non-sig	0.534607	0.0214126	p<0.05	0.950615	0.940689	non-sig	1.09654	0.315648	non-sig	0.71978	0.212961	non-sig	HMDB00126	most likley	171.006	16.53	0	8.43344	8.13309	1.76222	2.22297	18.339	18.6178	0.00915543	0.0301996	0.000979483	0.126299	0	0	-0.0566546	-0.0954508	0.0612967	-0.161658	0.0828631	0.0888347	-0.0302481	-0.0287914	-0.00802668	-0.150045	0.12356	-0.146559	0.249788	-1.56293
124	UVA	Lactic acid	Energy metabolism	0.817349	0.244689	non-sig	0.467863	0.00234716	p<0.01	0.836547	0.706373	non-sig	1.46143	0.0665375	p<0.1	0.813232	0.220557	non-sig	HMDB00190	most likley	89.0244	12.8	0	19.9538	19.8811	1.82973	1.83303	12.7531	12.8568	0.00568193	0.0190405	0.00117375	0.14109	0	0													0.346479	-1.20266
130	MVA_UVA	Malic acid	Energy metabolism	0.723732	0.137149	non-sig	0.495031	0.00687873	p<0.01	1.01788	0.937872	non-sig	1.48813	0.173843	non-sig	0.741013	0.0768174	p<0.1	HMDB00156	most likley	133.014	19.3	0	12.3291	12.0135	1.86315	1.96788	18.339	18.5634	0.00934934	0.0296129	0.0564282	0.0974466	0	0	-0.0441361	-0.100076	-0.130932	-0.0138182	-0.0132161	0.076869	-0.0362275	-0.0933759	-0.0957231	-0.12352	0.0926303	-0.0155287	0.250262	-1.55586
162	MVA_UVA	Oxoglutaric acid	Energy metabolism	0.872965	0.352799	non-sig	0.676242	0.074206	p<0.1	0.940231	0.761484	non-sig	1.21375	0.534413	non-sig	0.91441	0.498968	non-sig	HMDB00208	most likley	145.014	16.84	0	10.9835	10.6941	1.76001	3.09773	18.5142	18.7688	0.00992506	0.0322779	0.0936396	0.0917546	0	0	-0.0457733	-0.0801968	-0.113103	-0.0119427	-0.0432536	0.0801409	-0.0422816	-0.0695136	-0.0955259	-0.0711651	0.0812411	-0.17263	0.443421	-0.953841
178	MVA_UVA	Phosphocreatine	Energy metabolism	0.478803	0.20199	non-sig	0.352864	0.0240238	p<0.05	0.890613	0.923887	non-sig	1.20848	0.310693	non-sig	0.70866	0.246481	non-sig	HMDB01511	most likley	212.043	16.51	1	5.26956	5.38706	2.45059	3.28621	18.2628	18.6927	0.00866391	0.0343269	0	0.241997	0	0	-0.0293293	-0.0737584	-0.126391	0.107499	0.091845	0.0220822	-0.0418448	-0.173479	-0.00411575	-0.00515754	-0.0214834	-0.00458324	0.311343	-1.32425
199	MVA_UVA	Succinic acid	Energy metabolism	0.567515	0.0462802	p<0.05	0.276632	0.0028221	p<0.01	1.49075	0.125321	non-sig	3.05829	0.00908509	p<0.01	0.853486	0.430929	non-sig	HMDB00254	most likley	117.019	18	0	14.349	13.9816	1.76474	2.54871	18.339	18.5912	0.00934934	0.029082	0.00389045	0.0829861	0	0	-0.0686467	-0.0792901	-0.0499812	-0.158423	-0.0659245	0.0345531	-0.0219691	-0.00572494	-0.15555	-0.0739436	0.142755	-0.0502487	0.141234	-2.14024
46	MVA_UVA	Caprylic acid	Fatty acids and metabolites	0.815008	0.302038	non-sig	1.78094	0.0102436	p<0.05	1.9857	0.00345281	p<0.01	0.908711	0.578801	non-sig	0.758568	0.232296	non-sig	HMDB00482	most likley	143.108	9.24	0	11.3977	11.5747	1.70087	1.58033	9.48596	9.53306	0.00893196	0.0170025	0.173606	0.129556	0	0	-0.0810517	0.0937066	0.012018	0.014056	-0.0360885	0.0224769	0.00218729	-0.00959018	0.130259	-0.171966	0.0533291	0.0963935	0.396005	-1.06254
79	MVA_UVA	Eicosapentanoic acid	Fatty acids and metabolites	0.463218	0.0392184	p<0.05	0.652642	0.310991	non-sig	1.05784	0.53839	non-sig	0.750813	0.586477	non-sig	0.798524	0.192322	non-sig	HMDB01999	most likley	301.217	7.66	0	1.04345	0.997901	1.81566	1.90488	8.13533	8.2041	0.015357	0.021767	0	0.0442097	0	0	-0.102679	-0.039897	-0.0236776	0.0951179	0.085098	0.0805915	-0.109193	0.0616377	0.0497658	-0.0527303	0.0141462	0.0232098	0.133494	-2.22358
302	MVA_UVA	FA 12:0	Fatty acids and metabolites	0.601863	0.0885674	p<0.1	1.63284	0.179588	non-sig	2.62687	0.00302067	p<0.01	0.968263	0.822218	non-sig	0.928402	0.504738	non-sig	HMDB00638	most likley	199.17	8.63	0	5.95805	5.90782	1.96982	1.81895	8.81096	8.85713	0.0107327	0.0156871	0.0119584	0.0438653	0	0	-0.0980625	0.0598765	0.0814701	-0.102271	-0.0881971	-0.0398655	-0.0766925	0.0133561	0.0135867	-0.129006	-0.0370571	-0.133041	0.20464	-1.80047
310	MVA_UVA	FA 12:1	Fatty acids and metabolites	0.665093	0.21243	non-sig	2.69258	0.0304086	p<0.05	3.11646	0.00374485	p<0.01	0.769796	0.75667	non-sig	0.771037	0.0466169	p<0.05	HMDB00529	most likley	197.155	8.7	0	5.92744	6.07071	1.92707	1.49527	8.83499	8.88378	0.00927928	0.0156475	0.000194551	0.0538559	0	0	-0.0993303	0.0761028	0.0699794	-0.0534204	-0.098993	-0.0365325	-0.0991941	-0.0486681	0.0813023	-0.117328	-0.063522	0.0406948	0.315033	-1.2928
318	MVA_UVA	FA 12:2	Fatty acids and metabolites	0.535255	0.0538352	p<0.1	2.03227	0.0611114	p<0.1	3.57391	0.000665677	p<0.01	0.941289	0.965549	non-sig	0.828543	0.0792817	p<0.1	not existent		195.139	8.67	0	6.14775	6.18762	1.88211	1.99267	8.85822	8.98868	0.0107113	0.015661	0	0.057159	0	0	-0.10486	0.0775949	0.0584182	-0.0578273	-0.069828	0.0203095	-0.0809169	-0.0919243	0.059989	-0.0877644	-0.0720516	0.0537466	0.158814	-2.06308
303	MVA_UVA	FA 14:0	Fatty acids and metabolites	0.656724	0.225364	non-sig	1.33864	0.552599	non-sig	1.76489	0.0690775	p<0.1	0.865841	0.942853	non-sig	0.691885	0.0916553	p<0.1	HMDB00806	most likley	227.202	8.35	0	3.63538	3.56818	1.8707	2.14046	8.4924	8.57891	0.012921	0.0172852	0.00334348	0.0372836	0	0	-0.100634	0.0198497	0.113109	-0.067955	-0.0240305	-0.123232	-0.121289	0.00244723	-0.00260056	-0.0492116	-0.0533863	0.0177277	0.326963	-1.25546
311	MVA_UVA	FA 14:1	Fatty acids and metabolites	0.681099	0.275048	non-sig	2.87565	0.0173564	p<0.05	3.22981	0.00293469	p<0.01	0.764983	0.761744	non-sig	0.557574	0.0113838	p<0.05	HMDB02000	most likley	225.186	8.43	0	3.67492	3.67303	1.81993	1.82319	8.56509	8.66235	0.0101466	0.0167728	0.000205016	0.0378035	0	0	-0.0952216	0.0809188	0.0742096	-0.0385723	-0.0853375	-0.0833821	-0.090691	-0.025205	0.00706888	-0.12589	-0.0933517	0.128512	0.377391	-1.12577
319	MVA_UVA	FA 14:2	Fatty acids and metabolites	0.648261	0.0697062	p<0.1	2.7773	0.0195996	p<0.05	3.80141	0.000313898	p<0.01	0.887304	0.962811	non-sig	0.694336	0.0218227	p<0.05	HMDB00560	most likley	223.17	8.44	0	1.51324	1.33503	1.77482	4.13876	8.6781	8.70041	0.0122123	0.017833	0.000105209	0.0461935	0	0	-0.107897	0.0865544	0.0112771	-0.0139345	-0.0990994	-0.0288168	-0.0712333	-0.0505576	0.0612001	-0.145661	-0.0798946	0.144364	0.175723	-1.92858
304	MVA_UVA	FA 15:0	Fatty acids and metabolites	0.471225	0.0181356	p<0.05	0.828025	0.802669	non-sig	1.71593	0.0276845	p<0.05	0.976525	0.960668	non-sig	0.757985	0.142923	non-sig	HMDB00826	most likley	241.217	8.16	0	2.61497	2.64588	2.04713	1.68631	8.42156	8.45495	0.014234	0.0188855	0.0571899	0.0524367	0	0	-0.12062	-0.00175618	0.0679237	-0.027667	-0.0271634	-0.0342054	-0.12318	-0.0254039	-0.0114888	-0.00185438	0.0124038	-0.0091538	0.122935	-2.59905
312	MVA_UVA	FA 15:1	Fatty acids and metabolites	0.415488	0.104429	non-sig	0.634633	0.589222	non-sig	1.36799	0.27294	non-sig	0.895609	0.976865	non-sig	0.626705	0.011461	p<0.05	HMDB29765	most likley	239.202	8.17	0	2.89088	2.9106	1.82283	2.36412	8.40718	8.48106	0.00941864	0.022108	0.00495875	0.0796968	0	0	-0.101464	-0.03331	0.10253	-0.0437101	-0.0203159	-0.104312	-0.120539	-0.00307952	-0.0345847	-0.0724035	-0.0398815	0.0539732	0.217459	-1.7101
305	MVA_UVA	FA 16:0	Fatty acids and metabolites	0.562177	0.035847	p<0.05	0.909142	0.757669	non-sig	1.37849	0.117736	non-sig	0.852402	0.758572	non-sig	0.675633	0.100523	non-sig	HMDB00220	most likley	255.233	7.93	0	2.06959	1.99492	1.90299	1.6569	8.26942	8.34289	0.0160415	0.0182608	0.00651523	0.0387426	0	0	-0.120163	-0.0173607	0.0885893	-0.0110944	-0.0062487	-0.0338356	-0.127284	0.0206162	0.0065418	-0.0227159	0.000444143	0.0135041	0.130719	-2.26835
313	MVA_UVA	FA 16:1	Fatty acids and metabolites	0.651518	0.335433	non-sig	1.114	0.919002	non-sig	1.15554	0.495309	non-sig	0.67581	0.696162	non-sig	0.544856	0.0245008	p<0.05	HMDB03229	most likley	253.217	7.9	0	1.93841	1.82904	1.97887	1.59816	8.37107	8.4318	0.0144132	0.0184864	0.000647671	0.0390909	0	0	-0.0867081	-0.0185845	0.134993	-0.0364057	0.00769844	-0.13906	-0.114456	0.00713325	0.0206506	-0.104805	-0.042597	0.0489274	0.430229	-0.989713
320	MVA_UVA	FA 16:2	Fatty acids and metabolites	0.582908	0.0363848	p<0.05	2.32352	0.0215043	p<0.05	3.05739	0.000566233	p<0.01	0.767015	0.555054	non-sig	0.627358	0.0324887	p<0.05	HMDB00477	most likley	251.202	8.04	0	1.43227	1.57354	1.94532	1.88152	8.42368	8.48106	0.0122257	0.0195661	0.000220014	0.0386167	0	0	-0.115773	0.080347	0.0399914	0.00100139	-0.0390711	-0.00299462	-0.115679	-0.00301439	0.0165545	-0.105657	-0.0609897	0.0302602	0.130719	-2.26096
324	MVA_UVA	FA 16:3	Fatty acids and metabolites	0.657083	0.100709	non-sig	3.13061	0.0143118	p<0.05	4.08231	0.000434415	p<0.01	0.856834	0.886578	non-sig	0.734615	0.093417	p<0.1	not existent		249.186	7.97	0	1.66778	1.66194	1.8971	1.52948	8.42156	8.47977	0.0132681	0.0171828	0	0.0436046	0	0	-0.105512	0.0889197	0.0591322	-0.0477595	-0.0354063	-0.016671	-0.105587	-0.0034726	0.0226912	-0.102654	-0.100439	0.0321984	0.215474	-1.73017
306	MVA_UVA	FA 17:0	Fatty acids and metabolites	0.523487	0.00925277	p<0.01	1.05377	0.589267	non-sig	1.92606	0.00338814	p<0.01	0.956817	0.928391	non-sig	0.672314	0.11799	non-sig	HMDB02259	most likley	269.249	7.92	0	1.10213	1.07055	1.94715	1.56627	8.1657	8.24512	0.0147783	0.0193634	0.0511179	0.0842482	0	0	-0.124199	0.0332149	0.044491	0.00933996	-0.0122949	-0.0321087	-0.127068	0.0011898	0.00598131	0.0188051	0.00302381	0.0243789	0.122935	-2.91441
314	MVA_UVA	FA 17:1	Fatty acids and metabolites	0.516696	0.146919	non-sig	0.70219	0.543122	non-sig	1.0962	0.527424	non-sig	0.806619	0.804217	non-sig	0.571718	0.0422603	p<0.05	HMDB60038	most likley	267.233	7.8	0	0.996252	0.992313	2.01804	1.68955	8.24645	8.31894	0.0151498	0.0202289	0.000933425	0.0534647	0	0	-0.0984734	-0.047409	0.104655	-0.00594183	0.000344619	-0.132924	-0.124204	0.0108023	0.0274341	-0.0579433	-0.0111283	0.0447578	0.259568	-1.51586
307	MVA_UVA	FA 18:0	Fatty acids and metabolites	0.547507	0.0118297	p<0.05	0.93154	0.852601	non-sig	1.68385	0.0144018	p<0.05	0.989672	0.924339	non-sig	0.672479	0.0921206	p<0.1	HMDB00827	most likley	283.264	7.9	0	1.55356	1.48196	1.829	1.88784	8.03837	8.11092	0.0183994	0.0208525	0.0251198	0.046009	0	0	-0.128733	0.0103003	0.0142609	0.0369526	0.0330066	0.0111414	-0.126557	0.00326341	-0.0152043	0.0129001	0.0198658	0.0361182	0.122935	-2.80028
315	MVA_UVA	FA 18:1	Fatty acids and metabolites	0.57016	0.0891162	p<0.1	0.98401	0.937794	non-sig	1.3606	0.16288	non-sig	0.788365	0.678574	non-sig	0.591118	0.0612466	p<0.1	HMDB00207	most likley	281.249	7.73	0	1.53729	1.41422	2.03795	1.87798	8.08523	8.19172	0.0128297	0.0202194	0.000284623	0.0350271	0	0	-0.112228	-0.0105016	0.101454	-0.00324556	-0.027595	-0.0826529	-0.12418	0.0146849	0.0269265	-0.0522157	-0.0115308	0.0329379	0.20464	-1.79712
321	MVA_UVA	FA 18:2	Fatty acids and metabolites	0.534599	0.0345393	p<0.05	1.12995	0.664449	non-sig	1.68753	0.0333359	p<0.05	0.798399	0.676956	non-sig	0.644306	0.0819558	p<0.1	HMDB00673	most likley	279.233	7.77	0	1.40512	1.36463	1.90014	1.68823	8.22272	8.28901	0.0137043	0.0209065	2.61343e-05	0.0346252	0	0	-0.123555	0.0171683	0.0752474	-0.0106184	-0.0221813	0.00943475	-0.121253	0.0122786	0.0260627	-0.0500003	0.00851102	0.0201692	0.130719	-2.28678
325	MVA_UVA	FA 18:3	Fatty acids and metabolites	0.53587	0.0259841	p<0.05	1.08945	0.807098	non-sig	1.28538	0.159855	non-sig	0.63224	0.242713	non-sig	0.660158	0.101864	non-sig	HMDB03073	most likley	277.217	7.8	0	1.16564	1.2081	1.91462	1.51995	8.26942	8.35358	0.0123838	0.0183205	4.22109e-05	0.0438116	0	0	-0.121582	-0.000372522	0.0696362	0.0367272	0.0212452	0.0514508	-0.119108	0.0128937	0.028724	-0.0565005	-0.03208	0.0107083	0.122935	-2.42628
327	MVA_UVA	FA 18:4	Fatty acids and metabolites	0.494479	0.0331546	p<0.05	2.18024	0.0385061	p<0.05	1.66928	0.0550353	p<0.1	0.378595	0.0228709	p<0.05	0.770848	0.204166	non-sig	HMDB06547	most likley	275.202	7.92	0	0.760514	0.776217	1.84988	1.81204	8.37186	8.39826	0.0120965	0.0185991	0.00115088	0.0349293	0	0	-0.104855	0.0566349	0.0613325	0.0711894	0.00772532	0.110565	-0.109467	0.00924144	0.0963343	-0.0004975	0.0130551	0.0557757	0.130719	-2.307
308	MVA_UVA	FA 19:0	Fatty acids and metabolites	0.553761	0.0276513	p<0.05	0.847023	0.659918	non-sig	1.8524	0.0119546	p<0.05	1.21105	0.408249	non-sig	0.636638	0.0570871	p<0.1	HMDB00772	most likley	297.28	7.94	0	1.70976	1.64095	1.72593	1.79575	7.86302	8.03288	0.0198608	0.0223001	0.0128209	0.0657938	0	0	-0.116253	0.00609709	0.0413479	-0.015167	0.076075	-0.118654	-0.118521	0.0266108	0.0168933	-0.00228398	0.000372069	0.115775	0.125494	-2.39603
316	MVA_UVA	FA 19:1	Fatty acids and metabolites	0.573462	0.184002	non-sig	0.952751	0.751921	non-sig	1.60321	0.0835547	p<0.1	0.964975	0.898486	non-sig	0.560486	0.0511898	p<0.1	HMDB13622	most likley	295.264	7.75	0	1.49616	1.51768	1.88861	1.76008	7.96776	8.06312	0.0175135	0.022137	0.00101677	0.0649181	0	0	-0.100567	0.00547303	0.0811628	-0.00800323	-0.030322	-0.174956	-0.122885	0.0252279	0.034173	-0.0492841	-0.0218125	0.0587716	0.298792	-1.38161
309	MVA_UVA	FA 20:0	Fatty acids and metabolites	0.591591	0.0346025	p<0.05	0.46637	0.00915538	p<0.01	0.907344	0.838798	non-sig	1.15097	0.412023	non-sig	0.674929	0.0824538	p<0.1	HMDB02212	most likley	311.296	8.39	0	0.725891	0.780717	1.96242	2.04023	7.82177	7.90798	0.0198148	0.0250123	0.0110944	0.0742464	0	0	-0.0951107	-0.10967	-0.00144773	0.00510234	0.0107622	-0.0568434	-0.118467	-0.00957541	-0.0131196	0.0325943	-0.046103	0.105574	0.130719	-2.28587
317	MVA_UVA	FA 20:1	Fatty acids and metabolites	0.597147	0.0914554	p<0.1	0.608446	0.212728	non-sig	1.02302	0.521307	non-sig	1.00402	0.872326	non-sig	0.598193	0.0596868	p<0.1	not existent		309.28	7.66	0	1.11517	1.04367	1.81476	2.00171	7.90748	7.97727	0.0160679	0.0234917	0.000164774	0.038711	0	0	-0.100667	-0.0687419	0.068548	0.0112992	-0.0344803	-0.133004	-0.121077	0.0133328	0.0307212	-0.0358571	-0.0434355	0.0740635	0.20464	-1.78302
322	MVA_UVA	FA 20:2	Fatty acids and metabolites	0.478997	0.0120568	p<0.05	0.436385	0.0151176	p<0.05	0.867156	0.872063	non-sig	0.951832	0.955018	non-sig	0.615939	0.0560993	p<0.1	HMDB05060	most likley	307.264	7.55	0	1.34211	1.14436	1.90735	2.00975	7.96304	8.03472	0.015965	0.022964	0.000628877	0.0420659	0	0	-0.0980565	-0.10419	0.0423303	0.0179301	0.018321	-0.0129356	-0.127496	0.00908257	0.0129616	-0.0267445	0.0117114	0.0384501	0.122935	-2.7914
326	MVA_UVA	FA 20:3	Fatty acids and metabolites	0.458224	0.0179429	p<0.05	0.362006	0.00593287	p<0.01	0.763493	0.755233	non-sig	0.966423	0.84532	non-sig	0.635981	0.0824341	p<0.1	HMDB02925	most likley	305.249	7.5	0	1.27527	1.17422	1.97344	1.93073	8.05666	8.06139	0.0145282	0.0212514	0	0.0354653	0	0	-0.087859	-0.116994	0.0443526	0.00432456	0.0744472	-0.00870249	-0.125174	0.0409731	0.0126883	-0.0435515	-0.00303421	0.0109861	0.122935	-2.60413
328	MVA_UVA	FA 20:4	Fatty acids and metabolites	0.449367	0.0181033	p<0.05	0.983866	0.959786	non-sig	2.05754	0.0138267	p<0.05	0.939751	0.94008	non-sig	0.690994	0.200487	non-sig	HMDB01043	most likley	303.233	7.52	0	1.23769	1.14042	1.89584	1.77063	8.06871	8.11541	0.0171475	0.0213746	1.44849e-05	0.0573696	0	0	-0.12245	0.0229335	0.0493979	-0.0207385	0.080265	0.0338413	-0.120073	0.065897	-0.00365411	-0.0165968	0.0189014	-0.00106696	0.122935	-2.5999
329	MVA_UVA	FA 22:6	Fatty acids and metabolites	0.385046	0.0129713	p<0.05	1.28661	0.405512	non-sig	3.65141	0.000569591	p<0.01	1.09276	0.578722	non-sig	0.689308	0.228059	non-sig	HMDB02183	most likley	327.233	7.19	0	1.1762	1.01894	1.9771	1.68457	7.89037	7.95843	0.0156936	0.0253358	3.0975e-05	0.032467	0	0	-0.120373	0.0590644	0.0174887	-0.0225396	0.0532249	0.0330765	-0.117734	0.0761831	0.00190339	-0.00206179	0.0360063	-0.00407822	0.122935	-2.7572
182	MVA_UVA	Phytanic acid	Fatty acids and metabolites	0.591591	0.0346025	p<0.05	0.46637	0.00915538	p<0.01	0.907344	0.838798	non-sig	1.15097	0.412023	non-sig	0.674929	0.0824538	p<0.1	HMDB00801	most likley	311.296	8.18	0	0.758014	0.812841	1.96242	2.04023	7.82177	7.90798	0.0198148	0.0250123	0.0190096	0.0742464	0	0	-0.0951107	-0.10967	-0.00144773	0.00510234	0.0107622	-0.0568434	-0.118467	-0.00957541	-0.0131196	0.0325943	-0.046103	0.105574	0.130719	-2.28587
198	UVA	Suberic acid	Fatty acids and metabolites	0.321042	0.00603846	p<0.01	0.639559	0.503134	non-sig	4.64503	9.53682e-05	p<0.01	2.33168	0.0196699	p<0.05	0.877536	0.765254	non-sig	HMDB00893	most likley	175.096	19	1	4.85706	4.90774	2.38196	14.0304	18.2262	18.7019	0.00905772	0.0157588	0.411461	0.62618	0.0714286	0.210526													0.122935	-3.11054
224	UVA	Valeric acid	Fatty acids and metabolites	0.617605	0.252304	non-sig	0.740031	0.200055	non-sig	1.37097	0.464949	non-sig	1.14417	0.398405	non-sig	0.876411	0.578298	non-sig	HMDB00892	most likley	101.06	9.81	0	6.00109	6.10563	1.88106	1.75523	10.0546	10.0982	0.0119301	0.0199283	0.0244249	0.41576	0	0.157895													0.354427	-1.19062
264	MVA_UVA	LPC 16:0	Lipids, steroids, bile acids and metabolites	0.682817	0.0251751	p<0.05	0.89668	0.598233	non-sig	1.011	0.66264	non-sig	0.769872	0.161081	non-sig	0.850619	0.297884	non-sig	HMDB10382	exemplaric	496.34	3.79	1	5.71249	5.44707	1.88897	2.6976	4.32407	4.56031	0.0753045	0.122714	0.000382126	0.0289931	0	0	-0.109464	-0.0460241	0.0792335	0.0414525	-0.0385404	0.130381	-0.116542	0.0740081	0.0182318	0.0124214	0.0455262	-0.0310285	0.122935	-2.44162
265	MVA_UVA	LPC 16:1	Lipids, steroids, bile acids and metabolites	0.856085	0.466023	non-sig	0.548809	0.0315198	p<0.05	0.39081	0.00174474	p<0.01	0.609623	0.0516139	p<0.1	0.823924	0.326398	non-sig	HMDB10383	exemplaric	494.324	3.77	1	5.4839	5.21606	2.04233	2.2703	4.44718	4.42838	0.0887627	0.135492	0.000143171	0.0303075	0	0	-0.025414	-0.13659	0.0889334	0.0680649	0.0113835	-0.0182933	-0.102762	0.0860581	-0.00536585	-0.0260175	-0.0728671	-0.0443973	0.56113	-0.744772
266	MVA_UVA	LPC 18:1	Lipids, steroids, bile acids and metabolites	0.792936	0.198696	non-sig	0.578475	0.0132464	p<0.05	0.494981	0.00283056	p<0.01	0.678487	0.056169	p<0.1	0.800157	0.1289	non-sig	HMDB10408	exemplaric	522.355	3.78	1	5.47378	5.25904	1.76961	2.12317	4.28459	4.3862	0.0769088	0.116071	7.23599e-05	0.0294422	0	0	-0.0324648	-0.140398	0.0794872	0.0876693	0.0138205	0.00191871	-0.12224	0.028499	0.0471058	-0.0358948	0.0336473	-0.0273757	0.311343	-1.33444
267	MVA_UVA	LPC 18:2	Lipids, steroids, bile acids and metabolites	0.636497	0.00922133	p<0.01	0.688484	0.0494632	p<0.05	0.764773	0.205654	non-sig	0.707025	0.0479147	p<0.05	0.726309	0.0422582	p<0.05	HMDB10386	exemplaric	520.34	3.77	1	5.33518	5.08711	1.84245	1.80733	4.28459	4.27608	0.077626	0.118949	0.000121156	0.0279007	0	0	-0.0816859	-0.0988071	0.0376827	0.137875	0.0163649	0.110402	-0.110126	-0.00364519	0.0428292	0.00205307	0.121761	0.0665049	0.122935	-2.91598
268	MVA_UVA	LPC 18:3	Lipids, steroids, bile acids and metabolites	0.979874	0.883665	non-sig	1.10949	0.850302	non-sig	1.36522	0.170314	non-sig	1.20572	0.29075	non-sig	0.882346	0.334903	non-sig	HMDB10388	exemplaric	518.324	3.84	1	7.36678	9.16256	3.0634	2.57512	4.15881	4.2456	0.0665733	0.119586	0.000502297	0.207365	0	0	-0.0594055	0.0130727	0.086788	-0.0914074	0.102144	-0.0736859	-0.0674393	0.0514758	-0.130534	-0.0233246	-0.165337	0.0320127	0.920051	-0.148416
269	MVA_UVA	LPC 20:2	Lipids, steroids, bile acids and metabolites	0.672291	0.102411	non-sig	0.177382	1.04094e-06	p<0.01	0.205622	6.18372e-06	p<0.01	0.779321	0.430759	non-sig	0.645608	0.095105	p<0.1	HMDB10392	exemplaric	548.371	3.81	1	4.76738	4.71815	1.89322	2.14743	4.17988	4.29747	0.0651363	0.114881	0.00193342	0.0864645	0	0	0.00199208	-0.165407	0.0497065	0.0285064	0.0716534	0.0213274	-0.116209	0.0202144	0.0104403	-0.0122878	0.0560744	-0.0400788	0.215796	-1.7209
270	MVA_UVA	LPC 20:3	Lipids, steroids, bile acids and metabolites	0.810865	0.23079	non-sig	0.29043	6.71219e-06	p<0.01	0.398318	0.000399426	p<0.01	1.11208	0.504926	non-sig	0.731413	0.0303204	p<0.05	HMDB10394	exemplaric	546.355	3.79	1	5.19055	5.90704	2.30592	3.23403	4.11714	4.30923	0.0813434	0.106271	0.00147113	0.0322719	0	0	-0.00355363	-0.162579	0.0315177	0.0149731	0.105019	-0.0432292	-0.119837	0.00484271	-0.0239484	-0.0441947	-0.0162174	-0.0109421	0.332112	-1.2403
271	MVA_UVA	LPC 20:4	Lipids, steroids, bile acids and metabolites	0.637515	0.0231178	p<0.05	0.898933	0.686933	non-sig	0.946784	0.934011	non-sig	0.671451	0.0620888	p<0.1	0.789426	0.215719	non-sig	HMDB10395	exemplaric	544.34	3.78	1	5.61255	5.59498	1.81037	2.11328	4.28459	4.23502	0.0702634	0.115966	6.59785e-05	0.0241162	0	0	-0.0978721	-0.0339878	0.0593477	0.138778	0.0976646	0.0720217	-0.12418	0.0402891	0.00399025	-0.00151492	0.00177703	-0.0167821	0.122935	-2.48283
272	UVA	LPC 20:5	Lipids, steroids, bile acids and metabolites	0.891567	0.708381	non-sig	0.75557	0.261384	non-sig	1.06596	0.733988	non-sig	1.25782	0.275502	non-sig	0.757687	0.0160461	p<0.05	HMDB10397	exemplaric	542.324	3.81	1	8.78795	9.57303	2.15007	1.94784	4.18047	4.21969	0.0670878	0.113094	0.000491414	0.322851	0	0													0.76044	-0.380015
273	MVA_UVA	LPC 22:5	Lipids, steroids, bile acids and metabolites	0.661352	0.063293	p<0.1	0.588023	0.0298833	p<0.05	0.512901	0.00986886	p<0.01	0.576862	0.0220446	p<0.05	0.785985	0.262378	non-sig	HMDB10402	exemplaric	570.355	3.79	1	4.75148	4.65087	1.82534	2.8382	4.11993	4.21826	0.0623744	0.107596	0.000380597	0.0371861	0	0	-0.0394538	-0.117902	0.0989349	0.0971267	0.0847467	0.0695781	-0.111422	0.0130521	0.0879858	0.0150784	0.0802564	0.0356	0.169353	-1.97924
274	MVA_UVA	LPC 22:6	Lipids, steroids, bile acids and metabolites	0.557912	0.0208685	p<0.05	1.09679	0.53528	non-sig	1.47069	0.0572076	p<0.1	0.748107	0.272346	non-sig	0.838053	0.375339	non-sig	HMDB10404	exemplaric	568.34	3.78	1	5.62434	5.44415	1.82787	1.97335	4.06887	4.23502	0.0650848	0.10939	2.68678e-05	0.0253791	0	0	-0.11322	0.0283308	0.046049	0.0710415	0.109793	0.110051	-0.114824	0.0580698	0.033825	0.0274729	0.0724274	-0.0444449	0.122935	-2.53203
256	MVA_UVA	LPE 16:0	Lipids, steroids, bile acids and metabolites	0.640594	0.0325572	p<0.05	1.16549	0.578499	non-sig	1.22253	0.184151	non-sig	0.671947	0.150775	non-sig	1.04967	0.695604	non-sig	HMDB11503	exemplaric	454.293	7.96	1	5.71351	5.47805	1.83321	1.97782	8.1257	8.20409	0.0140258	0.0159491	0.000257674	0.0518493	0	0	-0.117108	0.000125245	0.0391719	0.0833036	-0.0880388	0.0782833	-0.0782577	0.0626492	0.122976	0.0428573	0.0236766	-0.138557	0.130719	-2.31597
257	MVA_UVA	LPE 18:0	Lipids, steroids, bile acids and metabolites	0.637142	0.0376649	p<0.05	1.04847	0.908099	non-sig	1.05918	0.453126	non-sig	0.643653	0.128345	non-sig	0.819187	0.319421	non-sig	HMDB11130	exemplaric	482.324	7.85	1	5.3351	5.1086	1.78726	2.10825	7.95104	8.0044	0.0166497	0.0176118	0.000478961	0.0600667	0	0	-0.113664	-0.0179893	0.0338426	0.0909267	-0.056797	0.124078	-0.112444	0.0478016	0.074019	-0.0346008	0.0536017	-0.0541527	0.130719	-2.24375
258	MVA_UVA	LPE 18:1	Lipids, steroids, bile acids and metabolites	0.664347	0.0764804	p<0.1	0.657594	0.152344	non-sig	0.529128	0.0596905	p<0.1	0.534562	0.0277355	p<0.05	0.719919	0.152758	non-sig	HMDB11506	exemplaric	480.308	7.76	1	5.62806	5.4429	1.79103	1.88273	8.08519	8.08967	0.0156332	0.0178711	0.000323529	0.0451049	0	0	-0.0684016	-0.110101	0.068969	0.0981299	-0.0709749	0.0513261	-0.119321	0.0410261	0.0505081	-0.00664253	0.0716222	0.0023566	0.185439	-1.87939
259	MVA_UVA	LPE 18:2	Lipids, steroids, bile acids and metabolites	0.626217	0.0446893	p<0.05	0.492465	0.0192248	p<0.05	0.396112	0.00482498	p<0.01	0.503694	0.0118504	p<0.05	0.700324	0.107914	non-sig	HMDB11507	exemplaric	478.293	7.83	1	5.58022	5.41234	1.75023	2.07375	8.12561	8.17484	0.0112216	0.0158128	8.37262e-05	0.0570971	0	0	-0.0488089	-0.129624	0.0834449	0.102308	-0.0301381	0.0628637	-0.089278	0.0170522	0.0420925	0.0361085	0.166001	0.103517	0.141234	-2.15794
260	MVA_UVA	LPE 20:4	Lipids, steroids, bile acids and metabolites	0.608986	0.0583179	p<0.1	0.65294	0.191088	non-sig	0.639157	0.311489	non-sig	0.596131	0.105452	non-sig	0.905122	0.623478	non-sig	HMDB11517	exemplaric	502.293	7.7	1	5.5486	5.33785	1.78689	3.06926	8.00899	8.08267	0.0145856	0.0196373	6.0228e-05	0.0562931	0	0	-0.0864776	-0.0934365	0.090928	0.0756601	0.0152147	0.0333165	-0.079981	0.0972351	0.116846	-0.0354955	0.0724124	0.00325103	0.163551	-2.02181
261	MVA_UVA	LPE 20:5	Lipids, steroids, bile acids and metabolites	0.896188	0.543042	non-sig	0.570164	0.0823899	p<0.1	0.490035	0.0989346	p<0.1	0.770241	0.609121	non-sig	0.704249	0.036791	p<0.05	HMDB11519	exemplaric	500.277	7.91	1	7.98799	9.65193	1.94558	2.27675	8.07071	8.15153	0.0153738	0.0165669	0.00208428	0.238252	0	0	-0.0369325	-0.111695	0.0959722	0.0295369	0.0896008	-0.0333216	-0.0913876	0.0173173	-0.0885128	0.0292609	0.116689	0.136218	0.632359	-0.619977
262	MVA_UVA	LPE 22:5	Lipids, steroids, bile acids and metabolites	0.56546	0.175999	non-sig	0.619982	0.27416	non-sig	0.505663	0.135994	non-sig	0.461194	0.0821063	p<0.1	0.93096	0.860534	non-sig	HMDB11524	exemplaric	528.308	7.55	1	5.29697	4.94972	1.64629	2.26693	7.91417	7.93206	0.0205742	0.0197292	0.000683901	0.0926533	0	0	-0.0548971	-0.0928932	0.139063	0.0225176	-0.00100676	0.0373304	-0.0656348	0.0516327	0.148385	-0.0162592	0.0063206	0.0586162	0.289867	-1.40858
263	MVA_UVA	LPE 22:6	Lipids, steroids, bile acids and metabolites	0.567468	0.043974	p<0.05	1.33001	0.37793	non-sig	1.37937	0.123977	non-sig	0.588528	0.162515	non-sig	0.997487	0.92376	non-sig	HMDB11526	exemplaric	526.293	7.61	1	5.54513	5.28954	1.71348	1.93148	7.9554	7.99099	0.0169902	0.0171656	0.000109964	0.0540988	0	0	-0.119218	0.0174969	0.0640217	0.0514589	0.0435546	0.0897804	-0.0676147	0.0867241	0.129033	-0.0574579	0.0648606	-0.0860142	0.141234	-2.16609
230	MVA_UVA	PC 32:0	Lipids, steroids, bile acids and metabolites	0.725001	0.125536	non-sig	1.1055	0.908886	non-sig	1.35723	0.151625	non-sig	0.890087	0.824277	non-sig	0.986284	0.995758	non-sig	HMDB11236	exemplaric	734.569	8	1	5.38725	5.03847	1.96735	2.42622	4.01452	4.05755	0.0185683	0.0163945	0.000391467	0.0631216	0	0	-0.0884422	0.00656335	0.105309	-0.0979858	0.0722916	0.041796	-0.101301	0.0104005	0.00174177	0.159475	-0.0160533	-0.0888942	0.238528	-1.60663
231	MVA_UVA	PC 32:1	Lipids, steroids, bile acids and metabolites	1.13361	0.576136	non-sig	0.555922	0.0403034	p<0.05	0.362052	0.000693803	p<0.01	0.738279	0.207831	non-sig	0.872965	0.629551	non-sig	HMDB13404	exemplaric	732.554	5.57	1	5.41817	5.15339	1.95203	2.34085	4.04522	4.05262	0.0187396	0.0158927	0	0.0814413	0	0	0.0117775	-0.129192	0.0675324	0.0611504	0.0239624	-0.161005	-0.102424	0.0607226	-0.00257175	0.098199	-0.0313222	-0.0478375	0.65791	0.569379
232	MVA_UVA	PC 32:2	Lipids, steroids, bile acids and metabolites	0.95686	0.771753	non-sig	0.85408	0.360283	non-sig	0.598326	0.0749898	p<0.1	0.670329	0.213907	non-sig	1.02547	0.789297	non-sig	HMDB08002	exemplaric	730.538	4.75	1	4.98225	5.00453	3.4908	4.04791	4.07975	4.06258	0.0381483	0.0420575	0	0.296132	0	0.0263158	-0.027533	-0.0767008	0.0368227	0.0878609	-0.0161813	-0.0656548	-0.0640257	0.12242	0.0248034	0.0719884	0.0173	-0.11807	0.822153	-0.294752
233	MVA_UVA	PC 34:1	Lipids, steroids, bile acids and metabolites	0.9142	0.775704	non-sig	0.548246	0.0115612	p<0.05	0.512988	0.00467134	p<0.01	0.855407	0.489383	non-sig	0.853413	0.280713	non-sig	HMDB08067	exemplaric	760.585	6.97	1	4.4267	5.15119	1.96234	2.78876	3.98812	4.00929	0.0085995	0.0144117	0.000537729	0.0410656	0	0	-0.0112736	-0.145408	0.0872728	0.00268555	-0.0111702	-0.0901943	-0.117649	-0.0190018	0.0288761	0.0661026	0.0403569	-0.065213	0.822153	-0.289238
234	MVA_UVA	PC 34:3	Lipids, steroids, bile acids and metabolites	0.753798	0.0605249	p<0.1	1.08318	0.683379	non-sig	0.744248	0.207967	non-sig	0.517932	0.00155624	p<0.01	0.883963	0.510709	non-sig	HMDB07974	exemplaric	756.554	4.76	1	5.49693	5.18788	2.02431	2.24521	3.97723	3.9895	0.0134812	0.0182258	0.000298957	0.0516607	0	0	-0.0741542	-0.0309601	0.0177486	0.210416	-0.0476051	0.0830668	-0.114561	0.0567284	-0.013723	0.077443	-0.00277803	-0.0655325	0.164814	-2.00254
236	MVA_UVA	PC 36:2	Lipids, steroids, bile acids and metabolites	0.736942	0.0247363	p<0.05	0.613722	0.00287489	p<0.01	0.82279	0.301371	non-sig	0.987985	0.94728	non-sig	0.75594	0.0719144	p<0.1	HMDB00593	exemplaric	786.601	7.3	1	5.62389	5.34086	1.86887	1.91783	3.94052	3.96678	0.0132788	0.0134538	0.000213591	0.0170372	0	0	-0.0705708	-0.125241	-0.0311531	0.0899284	0.0201917	0.00467056	-0.10418	-0.0640759	-0.0204771	0.0483202	0.11061	0.0432831	0.122935	-2.45014
237	MVA_UVA	PC 36:3	Lipids, steroids, bile acids and metabolites	0.841078	0.147675	non-sig	0.491363	5.17257e-05	p<0.01	0.493699	0.000101139	p<0.01	0.845076	0.245193	non-sig	0.771931	0.154875	non-sig	HMDB08012	exemplaric	784.585	5.58	1	4.40304	4.84295	2.08836	3.07186	3.94415	3.9586	0.0126175	0.0157671	0.000165191	0.0244622	0	0	-0.0164761	-0.163058	0.00827531	0.0978643	0.00693372	-0.0356577	-0.115545	0.00819699	-0.0108676	0.0551529	0.0391843	-0.0277371	0.259568	-1.51286
238	MVA_UVA	PC 36:4	Lipids, steroids, bile acids and metabolites	0.722911	0.0263929	p<0.05	1.24311	0.177151	non-sig	1.35438	0.0378977	p<0.05	0.787622	0.130911	non-sig	0.855327	0.507743	non-sig	HMDB08138	exemplaric	782.569	5.13	1	5.55144	5.37987	1.86426	1.92697	3.90695	3.93347	0.0092794	0.013197	0.000458396	0.0220905	0	0	-0.112125	0.0475077	0.00848498	0.127428	-0.00760993	-0.00175998	-0.116354	0.0480762	-0.0192058	0.0897181	-0.0126338	-0.0435531	0.122935	-2.4187
239	MVA_UVA	PC 36:5	Lipids, steroids, bile acids and metabolites	1.00947	0.992702	non-sig	0.871801	0.324071	non-sig	0.929447	0.60274	non-sig	1.07622	0.627705	non-sig	0.875586	0.255012	non-sig	HMDB07984	exemplaric	780.554	4.67	1	6.2042	6.8668	2.37634	3.08066	3.90681	3.97929	0.0130433	0.0148926	0.00182859	0.104708	0	0	-0.0120182	-0.0486304	-0.0457805	0.134278	0.0653752	-0.205209	-0.0878351	0.0306641	-0.0881938	0.0796735	-0.115157	0.0491042	0.992702	0.00927453
240	MVA_UVA	PC 38:3	Lipids, steroids, bile acids and metabolites	0.800475	0.424857	non-sig	0.0832397	1.03723e-07	p<0.01	0.177514	6.61462e-05	p<0.01	1.70706	0.0214882	p<0.05	0.744265	0.0207221	p<0.05	HMDB08046	exemplaric	812.616	8	1	6.5838	6.58745	1.91289	10.4574	3.88675	3.94234	0.0122957	0.0521418	0.000236489	0.0478938	0	0.0263158	0.0129353	-0.161891	-0.0194006	-0.0483604	0.100058	0.0208055	-0.103701	-0.0836922	-0.00128106	-0.0236915	0.0224446	0.0183448	0.52222	-0.816558
241	MVA_UVA	PC 38:4	Lipids, steroids, bile acids and metabolites	0.62306	0.0176613	p<0.05	1.04671	0.707923	non-sig	1.56412	0.0181636	p<0.05	0.931051	0.698227	non-sig	0.763162	0.169288	non-sig	HMDB08112	exemplaric	810.601	6.53	1	5.47732	5.28162	1.82555	2.0759	3.87627	3.86114	0.0120999	0.0156591	0.000259294	0.0297502	0	0	-0.110323	0.0402868	-0.0164603	0.0945569	0.0614747	-0.0192843	-0.123779	-0.0056058	-0.0455816	0.0431746	-0.00194205	0.00254635	0.122935	-2.61165
242	MVA_UVA	PC 38:5	Lipids, steroids, bile acids and metabolites	0.795021	0.101041	non-sig	0.858885	0.330084	non-sig	0.901573	0.639976	non-sig	0.834535	0.244533	non-sig	0.852745	0.515878	non-sig	HMDB07989	exemplaric	808.585	5.09	1	5.56698	5.54661	2.80414	5.45325	3.89918	3.88633	0.0150192	0.0166725	0.00017347	0.0422646	0	0	-0.0845786	-0.0680382	0.0660031	0.117982	0.0752943	-0.110262	-0.116989	0.0550669	0.00167817	0.0629489	-0.0186613	-0.046987	0.215474	-1.72835
243	MVA_UVA	PC 38:6	Lipids, steroids, bile acids and metabolites	0.652151	0.0164155	p<0.05	1.73506	0.0056459	p<0.01	2.47511	3.25609e-05	p<0.01	0.930307	0.769407	non-sig	0.898535	0.677364	non-sig	HMDB07991	exemplaric	806.569	4.87	1	5.6627	5.42477	1.90617	1.96001	3.87071	3.90757	0.011825	0.0154983	0.000675906	0.0275849	0	0	-0.106819	0.10274	-0.00981041	0.0432902	0.0109443	0.0249878	-0.107829	0.0653305	-0.0179662	0.100738	0.0335555	-0.0635588	0.122935	-2.64633
244	MVA_UVA	PC 38:7	Lipids, steroids, bile acids and metabolites	1.02466	0.930586	non-sig	1.38659	0.0322874	p<0.05	1.2183	0.16739	non-sig	0.900292	0.4381	non-sig	0.931943	0.681796	non-sig	HMDB08023	exemplaric	804.554	4.64	1	6.36467	7.52469	3.34059	2.89983	3.90742	3.91035	0.026811	0.0180874	0.00135969	0.173908	0	0	-0.0725052	0.0749944	0.0391986	0.117697	0.087423	-0.13559	-0.0888586	0.0625293	-0.0919894	0.0536462	-0.138381	-0.0371585	0.957637	0.0883354
245	MVA_UVA	PC 40:4	Lipids, steroids, bile acids and metabolites	0.711502	0.480156	non-sig	0.255278	0.00193469	p<0.01	0.596022	0.232055	non-sig	1.66121	0.112702	non-sig	0.876119	0.678992	non-sig	HMDB08054	exemplaric	838.632	8	1	6.53808	6.07608	3.26908	3.93196	3.8407	3.84563	0.0352043	0.0428581	0.00345074	0.195252	0	0	-0.0155603	-0.118811	0.0738348	-0.100973	0.0889202	-0.104415	-0.0800512	-0.023284	0.046176	-0.0115278	-0.161495	-0.0985042	0.56736	-0.721024
246	MVA_UVA	PC 40:5	Lipids, steroids, bile acids and metabolites	0.68155	0.469706	non-sig	0.611025	0.0885128	p<0.1	0.947189	0.851846	non-sig	1.05651	0.394269	non-sig	0.89482	0.619226	non-sig	HMDB08055	exemplaric	836.616	6.61	1	7.70692	7.1431	3.06877	6.82392	3.78648	3.83544	0.0210094	0.0501169	0.000585911	0.139824	0	0	-0.0302462	-0.0740046	0.0572446	-0.0649229	0.157413	-0.0975175	-0.104078	-0.0271686	0.0653883	0.0490002	-0.0162755	-0.0316747	0.561743	-0.738542
247	MVA_UVA	PC 40:6	Lipids, steroids, bile acids and metabolites	0.608082	0.0140155	p<0.05	1.3152	0.115489	non-sig	2.1683	0.000317845	p<0.01	1.00252	0.9505	non-sig	0.763627	0.0880547	p<0.1	HMDB08057	exemplaric	834.601	6.02	1	5.38386	5.13394	2.03422	1.99748	3.78268	3.81198	0.017522	0.0193472	0.000291987	0.0256078	0	0	-0.111113	0.082212	-0.0145152	0.0483315	0.0541872	0.0277895	-0.12145	-0.0192496	0.0141371	0.0273372	0.0971827	0.0114672	0.122935	-2.72088
248	MVA_UVA	PC 40:7	Lipids, steroids, bile acids and metabolites	0.791152	0.119046	non-sig	1.32719	0.139143	non-sig	1.47579	0.0204111	p<0.05	0.879736	0.529211	non-sig	0.82866	0.426591	non-sig	HMDB08090	exemplaric	832.585	4.8	1	5.45386	5.73308	2.03892	2.62243	3.78784	3.81546	0.0221131	0.016539	0.000337415	0.0329589	0	0	-0.105073	0.0619895	-0.0235582	0.119889	0.0654639	-0.052034	-0.114301	0.0575053	-0.0294189	0.0457155	0.00728034	-0.0746306	0.237742	-1.63675
249	MVA_UVA	PC 40:8	Lipids, steroids, bile acids and metabolites	0.760765	0.213582	non-sig	0.981493	0.899462	non-sig	1.29347	0.217641	non-sig	1.00258	0.908716	non-sig	0.753311	0.346634	non-sig	HMDB08188	exemplaric	830.569	4.54	1	5.84231	5.80505	2.92278	3.35236	3.8235	3.86179	0.0206704	0.0187626	0.000921512	0.0931659	0	0	-0.102207	-0.00134107	-0.00371628	0.0965844	0.0120733	-0.0635597	-0.119592	0.0461287	-0.0299323	0.0458391	-0.015704	-0.0547862	0.315033	-1.2894
250	MVA_UVA	PE 34:2	Lipids, steroids, bile acids and metabolites	0.90131	0.587336	non-sig	1.09292	0.663743	non-sig	0.923428	0.801156	non-sig	0.761531	0.227231	non-sig	1.35871	0.731896	non-sig	HMDB08928	exemplaric	716.522	9	1	5.485	5.37882	1.98214	2.63181	5.63544	5.71449	0.0147095	0.0289346	0.00337088	0.138796	0	0	-0.0376311	-0.0190477	0.0338334	0.065205	-0.293737	-0.0458688	0.0457956	-0.091611	0.0866536	0.0215801	0.168952	-0.0146671	0.666401	-0.552598
252	UVA	PE 36:2	Lipids, steroids, bile acids and metabolites	0.854304	0.281507	non-sig	0.945757	0.595611	non-sig	0.819143	0.288951	non-sig	0.739933	0.113707	non-sig	0.766208	0.156585	non-sig	HMDB08994	exemplaric	744.554	5.16	1	5.32549	5.41195	1.96369	2.42907	4.08777	4.85503	0.162653	0.169605	0.000638038	0.098997	0	0													0.382626	-1.11024
253	MVA_UVA	PE 36:3	Lipids, steroids, bile acids and metabolites	1.06402	0.838527	non-sig	1.03995	0.93694	non-sig	0.559832	0.0292015	p<0.05	0.572788	0.0518435	p<0.1	0.434929	0.051377	p<0.1	HMDB09060	exemplaric	742.538	9	1	5.37094	5.07273	2.93401	6.72338	5.60068	5.60492	0.0216085	0.0530466	0	0.229121	0	0	0.00504936	-0.0648523	-0.00617245	0.145614	-0.244731	-0.0228744	-0.0675462	-0.0679688	-0.109481	-0.0263494	0.0631003	-0.0410539	0.878221	0.206748
254	MVA_UVA	PE 36:4	Lipids, steroids, bile acids and metabolites	0.955557	0.799428	non-sig	1.22478	0.305568	non-sig	1.23853	0.220209	non-sig	0.966287	0.966711	non-sig	1.3744	0.224577	non-sig	HMDB08937	exemplaric	740.522	9	1	5.40742	5.14387	1.99592	2.27158	5.49358	5.55969	0.0556933	0.067623	0	0.0939343	0	0.0263158	-0.0704755	0.0234624	-0.00883996	0.0179671	-0.227354	-0.109857	0.0300501	-0.0453511	0.186188	0.0684171	0.0152876	-0.108296	0.842255	-0.257876
255	MVA_UVA	PE 38:2	Lipids, steroids, bile acids and metabolites	0.781464	0.0448627	p<0.05	0.757243	0.0529203	p<0.1	1.1404	0.224463	non-sig	1.17687	0.255734	non-sig	0.782867	0.123611	non-sig	HMDB09000	exemplaric	772.585	6.3	1	5.59832	5.77341	2.03933	2.18408	3.95001	3.99108	0.0125226	0.012892	0.000261049	0.0545605	0	0	-0.0920893	-0.0636414	-0.0670242	0.0536632	0.0069357	-0.125204	-0.110714	0.000150583	-0.0247405	0.0590052	0.121792	0.0436167	0.141234	-2.15599
177	MVA_UVA	Phosphocholine	Lipids, steroids, bile acids and metabolites	0.376292	0.0170791	p<0.05	0.411645	0.0415267	p<0.05	0.656893	0.319088	non-sig	0.600477	0.162253	non-sig	1.11547	0.775823	non-sig	HMDB01565	most likley	184.074	15.43	1	7.93798	7.77688	1.77968	2.34178	16.5013	16.5443	0.00746441	0.0182187	0.00266647	0.104132	0	0	-0.0401558	-0.0928307	0.0159821	0.0147507	-0.189359	0.055785	-0.0469096	-0.0505792	0.0091626	0.0699259	-0.0580852	-0.233839	0.122935	-2.62756
286	MVA_UVA	PS 38:0	Lipids, steroids, bile acids and metabolites	1.06618	0.662194	non-sig	0.654519	0.0595151	p<0.1	0.533882	0.00338638	p<0.01	0.86967	0.370884	non-sig	0.914969	0.219161	non-sig	HMDB10164	exemplaric	818.592	6.99	0	-0.805819	-0.327669	1.89497	3.54818	3.9733	4.00783	0.00750204	0.0163664	0.000866822	0.0696182	0	0	0.018719	-0.127212	0.0710644	0.0601997	-0.0871214	-0.131112	-0.0831938	0.00889219	0.00428478	-0.0137823	-0.170628	0.00474499	0.732552	0.444198
287	MVA_UVA	PS 38:1	Lipids, steroids, bile acids and metabolites	0.854511	0.176868	non-sig	1.10522	0.475547	non-sig	1.00522	0.975055	non-sig	0.777193	0.0498339	p<0.05	0.829203	0.14228	non-sig	not existent		816.576	6.5	0	-0.0607003	-0.155705	1.81524	1.67261	3.94857	3.99555	0.0126274	0.0173763	0.00193801	0.0517413	0	0	-0.05754	0.00334899	-0.00988051	0.189418	-0.167458	0.0695711	-0.068557	-0.00630483	0.0187165	0.0772003	0.128449	0.0914828	0.289867	-1.4056
288	MVA_UVA	PS 40:2	Lipids, steroids, bile acids and metabolites	0.99941	0.923236	non-sig	0.644011	0.00129175	p<0.01	0.490138	1.21517e-05	p<0.01	0.760622	0.0368818	p<0.05	0.84854	0.13022	non-sig	not existent		842.592	5.68	0	0.254339	0.356352	1.60423	3.47342	3.92759	3.96448	0.0139609	0.0166576	0.00119228	0.0744933	0	0	0.0241795	-0.142943	-0.00810081	0.147243	-0.0646651	-0.0357643	-0.0431622	-0.0722807	0.0623656	-0.00659369	-0.0269957	0.036116	0.95563	-0.0977187
289	MVA_UVA	PS 40:3	Lipids, steroids, bile acids and metabolites	0.828268	0.109031	non-sig	1.39491	0.0117969	p<0.05	1.27797	0.055685	p<0.1	0.758829	0.025156	p<0.05	0.957763	0.849368	non-sig	not existent		840.576	6.5	0	0.320606	0.236907	1.8259	1.66668	3.90861	3.95408	0.0124148	0.0149995	0.000943484	0.0528112	0	0	-0.0780621	0.0791989	-0.00296043	0.187946	-0.0619698	-0.0031696	-0.0946199	0.0849066	-0.00265267	0.0968982	-0.0726988	-0.0388382	0.2244	-1.68611
275	MVA_UVA	SM 34:1	Lipids, steroids, bile acids and metabolites	0.686223	0.0218339	p<0.05	1.11451	0.37217	non-sig	1.32977	0.0567823	p<0.1	0.818758	0.181498	non-sig	0.926375	0.797877	non-sig	HMDB10169	exemplaric	703.575	6.34	1	5.46507	5.13035	1.84268	2.03639	4.96467	5.00541	0.0604693	0.133204	0.000270084	0.060432	0	0	-0.0948449	0.0416964	0.0921452	0.0391787	0.0903743	0.124151	-0.0976795	0.0283545	0.0304727	0.133997	0.111407	-0.0297424	0.122935	-2.51033
276	MVA_UVA	SM 34:2	Lipids, steroids, bile acids and metabolites	0.77682	0.119543	non-sig	1.09253	0.440186	non-sig	1.00446	0.821055	non-sig	0.714202	0.0415842	p<0.05	0.941109	0.849955	non-sig	not existent		701.559	5.38	1	5.5956	5.43774	1.84322	1.93836	4.13802	4.38042	0.0365683	0.099489	0.000686235	0.0825103	0	0	-0.0844676	4.16719e-06	0.133095	0.0492635	0.0169399	0.136752	-0.0823762	0.050684	0.0598072	0.0911455	0.11772	-0.0219949	0.237742	-1.6344
277	UVA	SM 36:1	Lipids, steroids, bile acids and metabolites	0.599422	0.0548692	p<0.1	2.49202	0.000368683	p<0.01	2.44451	0.00122322	p<0.01	0.587995	0.0183808	p<0.05	1.21153	0.332671	non-sig	HMDB01348	exemplaric	731.606	8.37	1	5.49244	5.39126	2.25837	2.26184	5.02155	5.00626	0.0209506	0.209295	0.00225974	0.105783	0	0													0.159211	-2.05329
278	UVA	SM 36:2	Lipids, steroids, bile acids and metabolites	0.959007	0.651324	non-sig	3.25387	0.00155169	p<0.01	2.00377	0.0280463	p<0.05	0.590569	0.0894728	p<0.1	1.18713	0.454599	non-sig	HMDB12101	exemplaric	729.59	6	1	5.45548	5.41838	3.15192	2.51477	4.93117	4.96659	0.0802656	0.0892045	0.0207134	0.381292	0	0													0.725059	-0.459574
281	UVA	SM 40:1	Lipids, steroids, bile acids and metabolites	0.552792	0.0240982	p<0.05	0.73564	0.271045	non-sig	1.11403	0.383842	non-sig	0.837127	0.668996	non-sig	1.09097	0.312198	non-sig	HMDB12103	exemplaric	787.669	6	1	5.40121	5.33248	1.8661	2.40541	5.03497	5.05803	0.0585892	0.265238	0.00834513	0.041826	0	0													0.122935	-2.46278
282	UVA	SM 40:2	Lipids, steroids, bile acids and metabolites	0.756288	0.12436	non-sig	0.551901	0.0047619	p<0.01	0.698668	0.0744777	p<0.1	0.957407	0.777582	non-sig	1.03522	0.651046	non-sig	HMDB12104	exemplaric	785.653	6	1	5.84057	5.35553	1.66494	2.0129	4.97237	4.95129	0.0681254	0.163584	0.000886789	0.075889	0	0													0.238528	-1.61199
283	UVA	SM 42:1	Lipids, steroids, bile acids and metabolites	0.547928	0.16476	non-sig	0.725213	0.616121	non-sig	1.19379	0.990333	non-sig	0.90196	0.366839	non-sig	0.879769	0.558269	non-sig	HMDB11697	exemplaric	815.7	6	1	5.1405	5.3755	1.98977	4.13672	5.38953	5.85798	0.0717848	0.249746	0.00161119	0.340204	0	0													0.280409	-1.44819
284	UVA	SM 42:2	Lipids, steroids, bile acids and metabolites	0.651431	0.0207643	p<0.05	0.951268	0.828508	non-sig	1.40899	0.0500031	p<0.1	0.964877	0.833145	non-sig	0.938786	0.764269	non-sig	HMDB12107	exemplaric	813.684	6	1	5.39348	5.07553	1.77908	2.12893	4.99101	4.99214	0.0138456	0.173238	0.000987848	0.0409385	0	0													0.122935	-2.53443
285	MVA_UVA	SM 42:3	Lipids, steroids, bile acids and metabolites	0.646174	0.0227787	p<0.05	1.13956	0.38207	non-sig	1.74894	0.00417892	p<0.01	0.991717	0.91525	non-sig	1.01864	0.772131	non-sig	not existent		811.669	6	1	5.68107	5.57305	1.6902	2.27884	4.26778	4.94814	0.0920377	0.141631	0.00173481	0.0547187	0	0	-0.0924141	0.063233	0.0753005	-0.00328305	0.120383	0.0427055	-0.084714	0.0967206	0.0556099	0.0999096	0.0526544	-0.0807398	0.122935	-2.48995
204	MVA_UVA	Taurocholic acid	Lipids, steroids, bile acids and metabolites	0.546691	0.555624	non-sig	0.610714	0.166547	non-sig	1.89552	0.915241	non-sig	1.69681	0.355126	non-sig	24.7152	0.790164	non-sig	HMDB00036	most likley	514.284	9.65	0	1.12378	1.09539	1.69214	2.27538	9.81209	9.91092	0.0108192	0.0229707	1.66917e-05	0.053574	0	0.0526316	0.00204762	-0.0456414	-0.0441255	-0.00139172	-0.151718	-0.10987	0.0195181	-0.132578	0.0791147	0.106889	0.110843	0.0646305	0.642781	-0.600554
203	MVA_UVA	Taurodeoxycholate, Taurochenodeoxycholate	Lipids, steroids, bile acids and metabolites	0.78942	0.985559	non-sig	0.914001	0.804574	non-sig	1.87874	0.912972	non-sig	1.62267	0.708173	non-sig	9.0048	0.937961	non-sig	HMDB00896, HMDB00874	exemplaric	498.289	9.31	0	0.340158	0.0416856	2.01385	5.02206	9.47804	9.55962	0.00926603	0.0206153	0	0.0383724	0	0.131579	-0.015884	-0.0195643	-0.0561116	0.0637637	-0.0995975	-0.196103	0.00669959	-0.115887	0.0633843	0.148708	0.113406	0.0537942	0.991158	0.0183536
20	MVA_UVA	Adenine	Nucleotides and metabolites	0.556721	0.0497177	p<0.05	0.674863	0.157943	non-sig	1.63	0.123599	non-sig	1.34465	0.337696	non-sig	0.114517	0.063679	p<0.1	HMDB00034	most likley	136.062	7.54	1	4.41616	4.51142	1.7726	2.72792	8.09473	8.1162	0.00996262	0.0146575	0.00375279	0.145085	0	0	-0.0729789	-0.0255087	-0.115964	0.0417092	0.0222006	-0.0216452	-0.0566269	0.00530205	-0.0266288	-0.101456	0.139717	0.162524	0.149153	-2.10381
28	MVA_UVA	Allantoin	Nucleotides and metabolites	0.648583	0.0578496	p<0.1	1.2929	0.288048	non-sig	2.37835	0.000776737	p<0.01	1.1931	0.372643	non-sig	1.28735	0.0868561	p<0.1	HMDB00462	most likley	157.037	8.64	0	10.2261	10.1428	1.81302	1.85398	9.03891	9.07111	0.00876601	0.0119237	1.86201e-05	0.0335685	0	0	-0.0843861	0.0774391	-0.10821	0.0124045	0.0182914	0.00402445	0.0498126	-0.0563599	0.121287	-0.0209406	-0.0388153	-0.206645	0.163551	-2.02599
63	MVA_UVA	Cytidine	Nucleotides and metabolites	0.596052	0.0113501	p<0.05	0.6184	0.0501556	p<0.1	1.42088	0.0461294	p<0.05	1.36953	0.172221	non-sig	0.998121	0.988982	non-sig	HMDB00089	most likley	244.093	8.93	1	6.34962	6.1727	1.62372	2.00806	9.01318	9.04617	0.00808299	0.00788126	5.5487e-05	0.0348558	0	0	-0.114981	-0.0471797	-0.0594541	-0.0652973	-0.0290977	-0.00401782	0.0399455	-0.0773077	0.17312	-0.102984	0.00926499	0.0443523	0.122935	-2.81957
65	MVA_UVA	Cytosine	Nucleotides and metabolites	0.608507	0.01523	p<0.05	0.868543	0.429019	non-sig	1.92601	0.00295866	p<0.01	1.34938	0.135806	non-sig	0.941016	0.527797	non-sig	HMDB00630	most likley	112.051	8.7	1	2.17289	1.94608	1.61414	1.89797	8.09862	8.28832	0.0146243	0.0507782	0.000139153	0.0562396	0	0	-0.114925	0.0105717	-0.0826892	-0.0275503	-0.0659392	-0.052976	-0.00201935	-0.0632382	0.190323	-0.115011	0.0300616	0.0205524	0.122935	-2.68176
74	MVA_UVA	Deoxyuridine	Nucleotides and metabolites	0.458163	0.00164246	p<0.01	0.747176	0.220776	non-sig	2.57577	0.000391316	p<0.01	1.57945	0.0717592	p<0.1	1.36875	0.0726519	p<0.1	HMDB00012	most likley	227.067	5.62	0	3.04053	3.36562	1.68074	2.38736	5.92087	5.97712	0.0126773	0.0172379	0.000569282	0.0466202	0	0	-0.115149	0.015386	-0.0257805	-0.100031	0.0357344	0.0762578	0.0635983	-0.0120917	0.191117	0.0535848	0.0166806	-0.0102933	0.122935	-3.69896
117	MVA_UVA	Hypoxanthine	Nucleotides and metabolites	0.217668	0.324671	non-sig	0.204001	0.599373	non-sig	28.7792	0.0212326	p<0.05	30.7073	0.0723219	p<0.1	1.55007	0.451009	non-sig	HMDB00157	most likley	137.046	11.3	1	4.7296	4.59272	2.0191	9.2784	10.1102	10.0749	0.00835655	0.0384093	0.00411778	0.264214	0	0.0526316	-0.0522491	0.0159967	-0.0355654	-0.117828	-0.0642293	-0.245797	-0.00477021	0.165932	-0.0555782	0.00841518	-0.0819643	-0.00602987	0.419466	-1.01617
158	MVA_UVA	Orotic acid	Nucleotides and metabolites	0.797537	0.191161	non-sig	0.952938	0.906797	non-sig	1.33917	0.189012	non-sig	1.12078	0.901385	non-sig	0.647801	0.660181	non-sig	HMDB00226	most likley	155.01	11	0	5.76045	6.12604	6.32423	14.2833	13.5851	13.7041	0.00765697	0.0178447	0	0.181471	0	0.289474	-0.0994247	0.00443799	-0.0425751	0.0424026	0.0943074	-0.0855567	0.00154051	-0.0426652	0.0978438	-0.141802	0.13461	-0.11081	0.307596	-1.35827
209	MVA_UVA	Thymidine	Nucleotides and metabolites	0.510233	0.00290662	p<0.01	0.958424	0.910093	non-sig	3.295	1.23802e-05	p<0.01	1.75415	0.0171166	p<0.05	1.32203	0.0573618	p<0.1	HMDB00273	most likley	243.098	5.13	1	6.39259	5.89693	1.80084	1.97394	5.4336	5.40006	0.0139086	0.0151967	0.00214794	0.0343716	0	0	-0.108514	0.0575026	-0.0439798	-0.103525	-0.0137033	0.0199668	0.0509666	0.0242789	0.203961	0.0661421	-0.0301552	-0.0302078	0.122935	-3.44219
210	MVA_UVA	Thymine	Nucleotides and metabolites	0.522811	0.00255659	p<0.01	0.844838	0.424245	non-sig	3.1679	1.12198e-05	p<0.01	1.96039	0.0038109	p<0.01	1.1561	0.176944	non-sig	HMDB00262	most likley	125.036	5.07	0	13.425	13.164	1.82583	1.58593	5.38526	5.40757	0.0129467	0.0123894	0.00168777	0.072618	0	0	-0.110457	0.0405555	-0.057025	-0.11387	-0.00581185	-0.00286555	0.0205203	0.0241895	0.196193	0.0547134	-0.138568	-0.0162736	0.122935	-3.50002
218	UVA	Uracil	Nucleotides and metabolites	0.564253	0.0209293	p<0.05	0.539646	0.0242258	p<0.05	1.95482	0.012538	p<0.05	2.04396	0.0145678	p<0.05	0.859323	0.0902368	p<0.1	HMDB00300	most likley	111.02	6.72	0	15.561	15.4184	1.81839	1.68779	5.71413	5.73434	0.0109699	0.05132	0.000417158	0.0308359	0	0													0.122935	-2.53063
219	MVA_UVA	Uric acid	Nucleotides and metabolites	0.708895	0.0710556	p<0.1	0.536995	0.0118582	p<0.05	1.33547	0.122472	non-sig	1.76297	0.0222443	p<0.05	0.956735	0.617434	non-sig	HMDB00289	most likley	167.021	14.61	0	9.30741	9.06742	1.79025	1.82959	15.6414	16.1234	0.00895027	0.0172643	1.83328e-05	0.0572332	0	0	-0.0849954	-0.0670404	-0.119499	-0.0645512	0.0217925	0.00376715	-0.035889	-0.0846518	-0.129281	0.0111143	0.136684	-0.107334	0.175723	-1.91845
220	MVA_UVA	Uridine	Nucleotides and metabolites	0.532561	0.0106771	p<0.05	0.669951	0.123912	non-sig	2.39257	0.00202696	p<0.01	1.90191	0.0291364	p<0.05	0.797241	0.0837017	p<0.1	HMDB00296	most likley	243.062	6.82	0	2.84676	2.55424	1.9503	2.17951	7.27748	7.34497	0.0131935	0.0160206	2.437e-05	0.0293781	0	0	-0.105454	0.000137306	-0.0804274	-0.0892617	-0.0497352	-0.0345988	-0.0393157	-0.0749471	-0.160293	-0.0493555	0.138928	0.0317752	0.122935	-2.84802
227	MVA_UVA	Xanthine	Nucleotides and metabolites	0.816359	0.966633	non-sig	0.143203	0.41349	non-sig	4.14093	0.297619	non-sig	23.6063	0.0450874	p<0.05	1.10866	0.508986	non-sig	HMDB00292	most likley	151.026	15.2	0	10.6547	10.422	1.72915	2.02586	14.7395	14.7662	0.00530611	0.0108567	0.000119254	0.101285	0	0.236842	0.100061	0.00978457	-0.0283211	-0.13177	0.0147272	-0.206294	-0.00355078	0.136624	-0.127805	0.0375218	-0.02473	-0.0254857	0.981884	-0.0428913
228	MVA_UVA	Xanthosine	Nucleotides and metabolites	0.566164	0.123597	non-sig	0.298533	0.212194	non-sig	3.77145	0.00892919	p<0.01	7.15252	0.0198312	p<0.05	1.22607	0.623371	non-sig	HMDB00299	most likley	285.083	16.5	1	6.34006	5.98374	2.21427	2.22289	15.2474	15.5885	0.0104144	0.0161933	0	0.0717359	0	0.0263158	-0.0795567	0.0051281	-0.0726048	-0.123095	0.0481482	-0.0483729	-0.0145759	0.10836	-0.141342	0.00728785	-0.0459391	-0.0511505	0.238528	-1.62016
6	UVA	2-Oxovaleric acid	Others	0.790789	0.353233	non-sig	1.51998	0.348579	non-sig	1.85143	0.176496	non-sig	0.963225	0.61726	non-sig	1.12045	0.719884	non-sig	HMDB01865	most likley	115.04	9.49	0	14.6348	14.5856	1.01172	4.60257	9.83607	9.90863	0.0121771	0.0211245	0.0202077	0.551162	0	0													0.443421	-0.952959
21	MVA_UVA	Adenosine	Others	0.230391	0.148115	non-sig	0.06621	0.387807	non-sig	5.41147	0.129468	non-sig	18.8303	0.348342	non-sig	0.615916	0.325653	non-sig	HMDB00050	most likley	268.104	6.92	1	6.40276	6.11568	1.74838	2.508	7.28841	7.29388	0.0112541	0.0222925	7.47431e-05	0.0477017	0	0	-0.0480642	0.00731949	-0.0975885	-0.0515838	-0.0442813	-0.0358237	0.0145139	-0.0848382	-0.00857525	-0.0823104	0.243085	0.00522218	0.259568	-1.51112
48	MVA_UVA	Carnosine	Others	0.708106	0.283186	non-sig	0.562579	0.0249807	p<0.05	1.15904	0.716614	non-sig	1.45886	0.104846	non-sig	0.809826	0.55632	non-sig	HMDB00033	most likley	227.114	13.5	1	5.66725	5.67713	2.50314	3.15772	12.7125	12.7719	0.00985926	0.0101211	0.0167355	0.107658	0	0.157895	-0.0341641	-0.0720798	-0.140656	0.00329466	0.0919211	0.115064	0.0358196	-0.121683	-0.125989	0.00373298	0.092327	0.0609889	0.382626	-1.10625
58	MVA_UVA	Corticosterone	Others	0.859885	0.240606	non-sig	3.18344	0.0668382	p<0.1	6.36934	0.000793158	p<0.01	1.72043	0.500407	non-sig	0.299253	0.663222	non-sig	HMDB01547	most likley	347.222	3.68	1	6.07899	5.65708	1.67306	3.04688	4.12305	4.33008	0.051498	0.0734298	0	0.100451	0	0.105263	-0.0697904	0.115767	-0.0338913	0.0134824	0.123571	-0.0281813	-0.0421884	0.0198456	0.0375983	-0.0533008	0.144992	-0.150862	0.343446	-1.21599
111	MVA_UVA	Hippuric acid	Others	0.653098	0.0653267	p<0.1	0.193065	0.00166287	p<0.01	0.539735	0.678211	non-sig	1.82581	0.207007	non-sig	0.890032	0.309759	non-sig	HMDB00714	most likley	180.066	13.5	1	5.0177	4.61797	1.90566	10.2226	12.532	12.6019	0.00826879	0.0200636	0.00533159	0.112927	0	0.0263158	-0.0408005	-0.119142	-0.0519957	-0.0873765	-0.11049	0.0682126	-0.0351454	-0.16528	-0.0272309	0.0531436	-0.0106294	0.0468938	0.170042	-1.9627
118	MVA_UVA	Indoxyl sulphate	Others	0.900963	0.607034	non-sig	0.997441	0.960965	non-sig	1.73416	0.0489036	p<0.05	1.56643	0.118702	non-sig	0.694101	0.15349	non-sig	HMDB00682	most likley	212.002	10.9	0	4.86762	4.70652	1.90018	3.66062	8.71321	8.83265	0.0119931	0.0217266	2.79286e-05	0.0352091	0	0	-0.0544657	0.0333856	-0.135747	0.0350832	0.103217	-0.182684	-0.0614603	-0.12319	0.0245966	-0.0173425	0.0672131	0.0953327	0.684363	-0.523468
141	UVA	N-Acetylputrescine	Others	0.669345	0.708885	non-sig	1.89343	0.893599	non-sig	5.05026	0.0460866	p<0.05	1.78531	0.121033	non-sig	0.77602	0.523679	non-sig	HMDB02064	most likley	131.118	9.15	1	3.80638	3.96018	1.70724	2.10998	9.13774	9.14162	0.0281095	0.0490616	0.145068	0.30852	0	0.105263													0.76044	-0.379324
172	MVA_UVA	p-Cresyl glucuronide	Others	2.27087	0.0924739	p<0.1	16.8308	0.000131096	p<0.01	9.12046	0.0053268	p<0.01	1.23056	0.500358	non-sig	2.04306	0.907108	non-sig	HMDB11686	most likley	283.082	12.2	0	1.05434	0.49749	1.5606	12.9366	12.3731	12.515	0.00622183	0.0215415	0	0.107037	0	0.184211	-0.0053976	0.160143	-0.0600114	-0.0185272	0.0111666	-0.00116859	-0.0291235	-0.109564	-0.0285086	0.114275	0.0396025	-0.0496526	0.20464	1.8059
173	MVA_UVA	p-Cresyl sulphate	Others	0.665947	0.157268	non-sig	16.1742	0.000262988	p<0.01	25.9146	3.14752e-06	p<0.01	1.06699	0.532497	non-sig	1.11271	0.72146	non-sig	HMDB11635	most likley	187.007	6.56	0	7.22975	7.24733	1.91122	1.65913	7.20224	7.28806	0.0180362	0.029447	1.52631e-05	0.038264	0	0	-0.0735434	0.131069	-0.0481907	0.0106259	0.0248351	-0.0116456	0.00333276	-0.0528234	-0.0725869	0.0548885	-0.0587596	0.0212602	0.270256	-1.47583
211	MVA_UVA	Thymol	Others	0.700103	0.0714804	p<0.1	0.653648	0.0347364	p<0.05	0.824568	0.473102	non-sig	0.88317	0.719977	non-sig	1.08407	0.77013	non-sig	HMDB01878	most likley	149.097	4	0	10.3921	10.4215	1.82319	1.93244	3.62559	3.66065	0.0508334	0.0443478	0.155902	0.146492	0	0	-0.0423597	-0.0933121	-0.0475438	0.0141436	-0.197482	0.0645013	0.0417567	-0.0126222	-0.0242404	0.152958	0.147299	0.176263	0.175723	-1.9153
214	MVA_UVA	Trimethylamin-n-oxid	Others	0.994228	0.94158	non-sig	0.0769861	7.35585e-10	p<0.01	0.145257	4.12983e-08	p<0.01	1.8759	0.0177806	p<0.05	0.571794	0.0323878	p<0.05	HMDB00925	most likley	76.0757	9.8	1	-2.56036	-2.6157	1.78787	2.4704	9.93042	9.95659	0.00940288	0.0127191	0.00327157	0.0837889	0	0	0.0378701	-0.15698	-0.0309113	-0.00797084	0.0734652	-0.0313981	-0.067798	-0.084121	-0.0972295	-0.044755	-0.088229	0.0134423	0.963351	-0.0743139
331	MVA_UVA	Ketamine	Pharmaceuticals, Xenobiotics	0.596382	0.532789	non-sig	1.0608	0.90822	non-sig	2.02396	0.440794	non-sig	1.13787	0.988867	non-sig	0.563874	0.101791	non-sig	HMDB15352	most likley	238.099	4	1	5.94178	5.83785	1.67498	1.78183	3.67782	3.71117	0.0118365	0.0423228	5.74627e-06	0.0450491	0	0.0526316	-0.00765487	0.0363611	-0.151589	0.157353	0.0481029	0.000946484	-0.0413817	-0.00630178	-0.125647	-0.0285947	-0.0592595	0.114887	0.624527	-0.636719
201	MVA_UVA	Tartaric acid	Pharmaceuticals, Xenobiotics	0.389131	0.0226176	p<0.05	0.477875	0.0861608	p<0.1	1.36832	0.427547	non-sig	1.11421	0.89507	non-sig	0.340381	0.756531	non-sig	HMDB00956	most likley	149.009	21.8	0	10.8113	10.6048	2.0953	4.96404	18.3574	18.6826	0.00872356	0.0185115	0.0520225	0.224515	0	0.210526	-0.0315373	-0.0474314	0.0624768	-0.130081	-0.157351	0.153205	0.00969793	-0.104742	0.0531227	-0.0816291	0.118636	-0.0708057	0.122935	-2.49337
330	MVA_UVA	Xylazine	Pharmaceuticals, Xenobiotics	1.03063	0.970789	non-sig	0.994009	0.717475	non-sig	1.06542	0.671173	non-sig	1.10468	0.967425	non-sig	0.398109	0.294515	non-sig	not existent		221.111	5	1	5.73714	5.65373	1.67433	3.17834	3.68496	3.70973	0.0105045	0.0822613	7.57703e-06	0.0410439	0	0.236842	0.0266199	0.028904	-0.156408	0.144927	0.0252755	0.0356911	0.00735262	0.0356561	-0.187028	-0.161359	-0.0413588	0.00720296	0.981884	0.0373295
31	MVA_UVA	Alpha-Tocopherol	Vitamins, Coenzymes, Cofactors	0.85946	0.299298	non-sig	0.951369	0.736006	non-sig	1.11984	0.363051	non-sig	1.01166	0.838429	non-sig	0.600616	0.0328777	p<0.05	HMDB01893	most likley	429.374	4.24	0	1.8389	1.83841	1.50764	2.17201	3.29897	3.30148	0.0122397	0.0203346	0	0.17755	0	0	-0.103884	-0.0262588	0.0172729	0.0370082	-0.000186396	-0.127032	-0.103933	-0.002128	0.00631572	-0.0117753	0.0189548	0.096024	0.396005	-1.06877
36	MVA_UVA	Ascorbic acid	Vitamins, Coenzymes, Cofactors	1.36945	0.698551	non-sig	1.15568	0.412116	non-sig	0.738357	0.485741	non-sig	0.874933	0.608424	non-sig	0.946817	0.747231	non-sig	HMDB00044	most likley	175.025	16.91	0	8.20301	8.1783	1.57138	3.60347	18.339	18.6043	0.0101685	0.0295197	0.0109101	0.128566	0	0.0526316	-0.00973729	-0.0565451	0.100438	-0.147571	0.149505	-0.0185704	-0.0588976	0.00680683	0.0301037	0.185643	0.0379582	-0.0763302	0.758549	0.393529
47	MVA_UVA	Carnitine	Vitamins, Coenzymes, Cofactors	0.800087	0.170827	non-sig	0.732445	0.0647297	p<0.1	1.5349	0.031151	p<0.05	1.67665	0.00999517	p<0.01	0.967904	0.921348	non-sig	HMDB00062	most likley	162.112	11.5	1	5.31879	5.10516	1.77338	2.00012	10.5856	10.5412	0.00962022	0.0142464	0.0159216	0.0545996	0	0	-0.056706	-0.0280726	0.0195949	-0.210574	0.0505655	-0.0521119	-0.0115951	-0.135121	0.0773709	0.116054	-0.00688793	-0.0137939	0.285248	-1.42654
154	MVA_UVA	Niacinamide	Vitamins, Coenzymes, Cofactors	0.853462	0.455977	non-sig	0.382508	0.000261373	p<0.01	0.59641	0.0166438	p<0.05	1.33073	0.275522	non-sig	1.05814	0.498545	non-sig	HMDB01406	most likley	123.055	4.49	1	4.43105	3.96144	1.6837	1.82668	4.91968	4.89872	0.0192525	0.0163044	0.000244696	0.044858	0	0	-0.00208088	-0.143565	-0.00930239	-0.0675711	0.0389446	0.0396328	0.0176629	0.126656	0.0465698	0.0604909	0.0257931	-0.0275526	0.552794	-0.761918
155	UVA	Nicotinic acid	Vitamins, Coenzymes, Cofactors	0.76026	0.166652	non-sig	0.91505	0.677549	non-sig	1.75434	0.00912447	p<0.01	1.45757	0.0732758	p<0.1	NA	NA	NA	HMDB01488	most likley	124.039	13.6	1	3.15201	2.54175	1.75956	5.1501	13.5724	14.0369	0.0297878	0.0430899	0.245137	0.227622	0	0.236842													0.280928	-1.44137
167	MVA_UVA	Palmitoylcarnitine	Vitamins, Coenzymes, Cofactors	0.568557	0.0641055	p<0.1	3.27407	0.0342619	p<0.05	4.53244	0.00103947	p<0.01	0.787079	0.72372	non-sig	0.995992	0.951174	non-sig	HMDB00222	most likley	400.342	3.81	1	6.08312	5.83821	1.74411	2.22969	4.12681	4.13905	0.0580516	0.0713125	0.00107498	0.0892473	0	0	-0.0685093	0.0964224	0.0641528	-0.0578832	-0.0726077	0.0983627	-0.0492607	0.0384078	0.204853	-0.0126726	-0.0562723	-0.0280974	0.169353	-1.97258
171	MVA_UVA	Pantothenic acid	Vitamins, Coenzymes, Cofactors	0.761803	0.125654	non-sig	1.27005	0.301582	non-sig	2.08094	0.00119258	p<0.01	1.24819	0.256106	non-sig	0.601574	0.127041	non-sig	HMDB00210	most likley	220.118	13.5	1	5.81857	5.71498	1.93717	1.89215	12.6844	12.7998	0.00594232	0.0176625	0.000571401	0.0624923	0	0.0263158	-0.108939	0.0669878	-0.0533022	-0.0359883	0.0886724	0.0173737	-0.054726	-0.157406	-0.0323811	-0.000701475	-0.0328356	0.0423418	0.238528	-1.60609
186	MVA_UVA	Pyridoxine	Vitamins, Coenzymes, Cofactors	0.83917	0.631695	non-sig	0.788271	0.296761	non-sig	0.806265	0.792355	non-sig	0.858327	0.752848	non-sig	2.62859	NA	NA	HMDB00239	most likley	170.081	8.44	1	5.51032	5.06262	1.93863	11.5549	6.8392	6.93893	0.0146475	0.0550442	0.00397903	0.0817436	0	0.263158	0.0132525	-0.0314201	-0.170654	0.120568	-0.00565393	0.0270533	0.0297294	-0.0492702	0.102093	0.156822	0.00655441	0.0993224	0.707658	-0.487635
190	MVA_UVA	Riboflavin	Vitamins, Coenzymes, Cofactors	0.548894	0.0197289	p<0.05	0.584826	0.0287763	p<0.05	1.31696	0.279731	non-sig	1.23604	0.363597	non-sig	1.08028	0.637302	non-sig	HMDB00244	most likley	377.146	6.35	1	6.16372	6.16424	1.83585	2.75186	6.69131	6.68787	0.0175279	0.0211035	0.000912864	0.0455273	0	0	-0.0740687	-0.0580354	-0.104467	-0.0289651	-0.002663	0.085996	0.0336987	-0.120268	0.118351	-0.0106822	0.0238448	-0.0554205	0.122935	-2.5589
[truncated: 8 more columns]

## Sheet: per-sample
Sample_name	group	mouse_ID	Genotype	Feeding	BW_terminal_g	age_weeks	sex	Seq_Pos	PC1_Cfed_GRfed_C48_GR48_157metabolites	PC2_Cfed_GRfed_C48_GR48_157metabolites	PC3_Cfed_GRfed_C48_GR48_157metabolites	PC4_Cfed_GRfed_C48_GR48_157metabolites	PC5_Cfed_GRfed_C48_GR48_157metabolites	PC6_Cfed_GRfed_C48_GR48_157metabolites	PC1_CHFD_GRHFD_157metabolites	PC2_CHFD_GRHFD_157metabolites	PC3_CHFD_GRHFD_157metabolites	PC4_CHFD_GRHFD_157metabolites	PC5_CHFD_GRHFD_157metabolites	PC6_CHFD_GRHFD_157metabolites	MVA_UVA.1.1,5-Anhydrosorbitol.LOG_Peakarea	MVA_UVA.108.Hexose.LOG_Peakarea	MVA_UVA.111.Hippuric acid.LOG_Peakarea	MVA_UVA.113.Histidine.LOG_Peakarea	MVA_UVA.117.Hypoxanthine.LOG_Peakarea	MVA_UVA.118.Indoxyl sulphate.LOG_Peakarea	MVA_UVA.123.Kynurenine.LOG_Peakarea	MVA_UVA.125.L-Cystathionine.LOG_Peakarea	MVA_UVA.126.Isoleucine, Leucine.LOG_Peakarea	MVA_UVA.129.Lysine.LOG_Peakarea	MVA_UVA.130.Malic acid.LOG_Peakarea	MVA_UVA.135.Mannitol, Sorbitol.LOG_Peakarea	MVA_UVA.136.Methionine.LOG_Peakarea	MVA_UVA.154.Niacinamide.LOG_Peakarea	MVA_UVA.157.Ornithine.LOG_Peakarea	MVA_UVA.158.Orotic acid.LOG_Peakarea	MVA_UVA.162.Oxoglutaric acid.LOG_Peakarea	MVA_UVA.167.Palmitoylcarnitine.LOG_Peakarea	MVA_UVA.171.Pantothenic acid.LOG_Peakarea	MVA_UVA.172.p-Cresyl glucuronide.LOG_Peakarea	MVA_UVA.173.p-Cresyl sulphate.LOG_Peakarea	MVA_UVA.174.Pentose.LOG_Peakarea	MVA_UVA.176.Phenylalanin.LOG_Peakarea	MVA_UVA.177.Phosphocholine.LOG_Peakarea	MVA_UVA.178.Phosphocreatine.LOG_Peakarea	MVA_UVA.182.Phytanic acid.LOG_Peakarea	MVA_UVA.183.Proline.LOG_Peakarea	MVA_UVA.186.Pyridoxine.LOG_Peakarea	MVA_UVA.187.Pyroglutamic acid.LOG_Peakarea
03_M1_pE_5552_Cfed	Cfed	5552	CTRL	fed	30.63	8	male	3	-6.05742	-5.03842	2.08685	1.90314	4.09224	3.76764							9.2056	10.3139	7.44911	8.82555	5.88857	8.88925	7.30062	6.21208	10.2214	8.96427	9.00048	7.8126	8.40727	8.86469	8.21325	6.77964	8.05129	7.69062	8.11577	5.85067	8.55093	8.41028	9.65102	7.4204	6.91092	7.96397	8.11449	5.94166	8.0511
14_M1_pE_9618_Cfed	Cfed	9618	CTRL	fed	29.03	8	male	14	-0.188051	-5.16315	-6.16493	1.65694	1.15944	2.01176							9.3753	10.4551	7.7774	8.87934	5.38826	9.43974	7.49699	6.8505	10.174	9.15359	9.21099	7.27033	8.41576	8.85357	8.22071	6.9324	8.02158	7.36162	8.08862	5.75696	8.28568	8.57484	9.62597	7.64335	7.15019	7.80979	8.04685	7.37883	8.00242
25_M1_pE_5583_Cfed	Cfed	5583	CTRL	fed	24.58	8	male	25	-9.10397	-10.046	4.58242	-0.503264	-1.14465	0.283931							9.24787	10.3369	7.77563	8.95723	5.95098	9.06686	7.50741	6.6333	10.3531	9.17009	9.05983	7.9591	8.46621	9.01307	8.38207	6.61644	7.97826	7.7651	8.06194	5.08669	8.7541	8.45834	9.74593	7.855	6.60104	8.19445	8.17749	6.23148	8.47729
34_M1_pE_3188_Cfed	Cfed	3188	CTRL	fed	28.8	8	male	34	-0.701556	-4.97425	-3.9797	0.884379	1.22376	-1.84551							9.30888	10.3977	7.60878	8.87688	7.63448	9.45811	7.69085	6.5676	10.2086	9.06036	8.96293	7.57371	8.56278	8.7704	8.20426	6.76915	8.10527	7.22158	8.00681	6.52359	8.75229	8.54928	9.66326	7.46615	6.62704	7.81524	8.13168	7.15039	8.00328
45_M1_pE_5587_Cfed	Cfed	5587	CTRL	fed	28.32	8	male	45	-1.29684	-7.13566	0.89546	-3.61342	-5.81773	0.343546							9.30371	10.3763	7.98907	8.912	7.18734	8.98675	7.63978	6.51868	10.2279	8.98267	9.09649	7.78704	8.27088	8.86228	8.16124	6.69418	8.17605	7.44004	7.8196		8.14877	8.4824	9.635	8.189	6.15966	7.78173	8.10642	6.12934	8.43147
05_M1_pE_5558_C48	C48	5558	CTRL	48h fast	22.26	8	male	5	-10.1636	3.07872	6.23698	-0.353117	2.22651	2.19249							8.48373	9.57141	6.84759	8.93747	5.99795	9.16596	7.47229	6.25785	10.3765	8.93833	8.85691	7.17978	8.45679	8.76093	8.17808	6.74735	7.9756	8.23316	8.32824	7.03394	9.84839	7.73306	9.66069	7.2249	6.21554	7.71726	8.04837	5.19637	8.11063
13_M1_pE_3186_C48	C48	3186	CTRL	48h fast	25.3	8	male	13	2.50574	6.20986	-2.44736	4.02434	0.872655	1.9357							8.99775	10.0814	7.11815	8.78031		9.50057	7.99341	6.72146	10.0126	8.77801	8.87894	6.57009	8.47573	8.40346	7.9797	6.66542	7.90236	7.91574	8.13218	7.59333	9.9516	8.18933	9.59798	7.23346	6.61616	7.35406	7.97412	7.20464	7.85968
23_M1_pE_5559_C48	C48	5559	CTRL	48h fast	24.26	8	male	23	3.1914	6.81424	10.0478	0.192349	1.8368	1.73358							8.50254	9.57758	6.69184	8.54384		8.85411	7.25111	5.77819	10.0633	8.6753	8.50765	7.0478	8.37521	8.36538	7.87172	6.57776	7.71707	8.07356	7.96346	7.14877	9.318	7.79478	9.38272	7.43973	5.5229	7.45976	7.75246	4.49472	8.08326
35_M1_pE_9114_C48	C48	9114	CTRL	48h fast	25.8	8	male	35	-5.84049	4.76555	-2.36984	5.34291	-3.5158	-0.729823							9.06606	10.154	7.29436	8.9954	6.08854	9.45788	7.66496	6.47408	10.3387	8.8881	8.81617	6.99828	8.59285	8.28052	8.03865	6.87245	7.92636	7.85891	8.21571	7.53737	10.0754	8.30173	9.7605	7.63911	6.49607	7.87088	7.79922	6.9999	8.03249
44_M1_pE_5563_C48	C48	5563	CTRL	48h fast	21.48	8	male	44	-0.504698	5.84133	9.38117	1.15184	-2.00538	-2.405							8.75276	9.83253	6.97755	8.53924	6.86791	8.90402	7.51365	5.86634	10.153	8.6392	8.5892	7.2471	8.31032	8.26857	7.68838	6.83262	7.81904	8.21448	8.01105	6.44996	8.8727	7.95735	9.48513	7.59435	6.00035	7.59647	7.64978	4.57848	8.09666
64_M1_pE_9110_C48	C48	9110	CTRL	48h fast	22.5	8	male	64	0.0341997	6.54307	-4.38553	4.81439	-4.23312	2.7683							9.16669	10.2339	7.07699	8.90815	5.41358	9.07847	7.90135	6.39601	10.2177	8.87527	8.83775	6.93959	8.55493	8.48207	8.09146	6.74181	8.00884	7.88902	8.04026	7.26286	9.66778	8.39823	9.72708	7.22024	6.51662	7.45154	8.00567	7.12948	8.10966
04_M1_pE_5553_GRfed	GRfed	5553	GR KO	fed	31.02	8	male	4	1.90357	-3.95671	-2.42953	-1.85667	0.70551	0.106907							9.28367	10.3798	7.67866	8.84671	7.06989	9.27634	7.41099	6.54999	10.2662	9.0258	9.10285	7.66062	8.4036	8.81647	8.22921	6.82701	8.23319	7.34437	8.08401	6.65494	8.85037	8.48504	9.65073	7.49244	6.38746	7.81335	8.09083	5.78045	7.96808
15_M1_pE_3189_GRfed	GRfed	3189	GR KO	fed	30.3	8	male	15	3.55012	-4.89186	-4.20977	3.04446	2.95985	-2.3783							9.30148	10.3828	7.04323	8.88298	5.84206	9.55416	7.79264	6.47435	10.2133	9.04204	9.01073	7.4228	8.46067	8.87395	8.23918	6.89047	8.08661	5.76353	8.04627	6.0536	8.38602	8.5215	9.64761	7.55915	6.7044	7.67484	8.15643	7.37182	7.90854
24_M1_pE_5579_GRfed	GRfed	5579	GR KO	fed	26.52	8	male	24	8.62847	-3.12059	3.80627	-0.0970553	1.24249	-1.15386							9.04946	10.1388	7.2399	8.6363	5.47541	9.05184	7.47987	6.18837	10.0725	8.87085	8.7288	7.60993	8.32385	8.86864	8.05675	6.5028	7.77385	7.28064	7.78542		7.60861	8.27163	9.50566	7.04266	6.39075	7.51097	7.80297	5.94112	7.91802
33_M1_pE_3187_GRfed	GRfed	3187	GR KO	fed	33.3	8	male	33	14.8208	-1.6642	-0.424023	3.63307	3.21899	-1.97853							9.0366	10.1187	6.63788	8.50803	4.89807	9.08985	7.42862	6.54596	9.8688	8.8674	8.84507	7.10039	8.3271	8.54997	8.03525	6.38331	7.86161	6.89631	7.6493	6.38489	8.49376	8.28848	9.33434	6.96987	6.57764	7.57521	7.9177	7.21197	7.794
43_M1_pE_5584_GRfed	GRfed	5584	GR KO	fed	26.76	8	male	43	-6.6593	-9.27993	2.39129	0.776856	-1.96485	-0.859386							9.30697	10.3939	8.08441	8.95509	6.42374	9.036	7.62524	6.48511	10.2657	9.08006	9.06668	7.93961	8.39859	8.889	8.3218	6.87988	8.11162	7.73	8.03664		8.11617	8.53795	9.65935	7.58506	6.54467	8.04317	8.18233	5.72066	8.23465
65_M1_pE_5585_GRfed	GRfed	5585	GR KO	fed	27.68	8	male	65	21.2157	-1.1844	2.2459	-4.03315	-3.42408	2.46919							8.88795	9.95002	7.34371	8.50838	5.48554	8.49594	7.09548	6.26725	9.85102	8.85023	8.66858	7.48991	8.18493	8.78835	8.08587	5.77684	7.80384	7.19568	7.63438		7.33503	8.10346	9.27763	7.32081	6.04464	7.27252	7.93029	5.65013	8.19846
08_M1_pE_5564_GR48	GR48	5564	GR KO	48h fast	20.08	8	male	8	-3.34206	5.05411	-2.49198	-7.31989	4.00489	1.11077							9.07479	10.1692	7.56605	8.90638	5.77117	9.41274	7.78136	6.30975	10.372	9.02726	8.77819	7.48799	8.43089	8.44391	8.34518	7.03594	7.91278	7.97238	8.32622	7.34468	9.75908	8.26992	9.75418	7.01164	6.42604	7.68665	8.21536	5.6509	8.13641
19_M1_pE_3185_GR48	GR48	3185	GR KO	48h fast	25.5	8	male	19	-2.76334	4.9162	-7.78113	-3.28098	0.684438	-0.459501							9.17299	10.2551	7.37347	8.93187	8.39583	9.48892	7.85305	6.65384	10.2358	8.94865	9.15529	7.28261	8.53172	8.64989	8.02799	6.81786	8.19262	8.01112	8.31674	7.62232	9.89824	8.37531	9.78436	7.26217	6.39445	7.62713	8.0191	7.18423	8.01049
29_M1_pE_5589_GR48	GR48	5589	GR KO	48h fast	19.53	8	male	29	-2.79968	4.72538	-1.71867	-4.46274	-0.209092	-2.77473							9.13219	10.2189	6.97287	8.94154	7.73784	9.37462	7.54564	6.33388	10.4025	9.00285	8.82399	7.32981	8.55409	8.87251	8.30114	6.73782	7.75499	7.89024	8.20405	7.25795	9.89019	8.3064	9.79855	7.1363	6.24625	7.65442	8.11137	5.50416	8.15213
38_M1_pE_3184_GR48	GR48	3184	GR KO	48h fast	22.48	8	male	38	-2.77172	3.93518	-5.92924	-2.26272	-2.1977	0.240238							9.22319	10.3024	7.25306	8.95222	6.40607	9.37359	7.78144	6.57696	10.2729	8.99382	9.10211	7.30736	8.50551	8.31938	8.27269	6.4323	8.11534	7.82484	8.10875	7.48841	9.82007	8.43644	9.8047	7.43484	6.55021	7.68257	8.08721	7.08652	8.27704
50_M1_pE_5591_GR48	GR48	5591	GR KO	48h fast	20.93	8	male	50	-3.65725	4.57151	2.65754	0.358339	0.284837	-4.37942							9.07415	10.1607	7.11392	8.74362	7.85604	9.4674	7.64726	6.23962	10.2715	8.80741	8.61811	7.00147	8.43969	8.40244	7.98649	6.77339	7.77431	8.03616	8.15268	6.99225	9.53463	8.23263	9.64513	7.04319	6.50022	7.71043	7.90447	5.18471	8.05552
09_M1_pE_1_CHFD	CHFD	1	CTRL	HFD	21.18	6	male	9							-10.7782	5.06884	-2.03364	1.4862	6.42102	1.78604	9.28593	10.3561	6.10815	8.58531	7.6269	8.463	6.94949		10.219	8.76086	9.04947	7.2512	8.31655	9.08468	7.80351		8.14816	6.78827	7.23862		8.91079	8.47444	9.63909	7.44258	6.12423	7.37642	7.56344		7.05603
20_M1_pE_6_CHFD	CHFD	6	CTRL	HFD	21.03	6	male	20							4.0243	-9.97037	0.37148	-2.8275	2.335	-0.319118	9.26722	10.3488	6.76755	8.71295	6.62493	8.44788	7.1826	6.05096	10.2385	8.83344	9.17767	7.30368	8.26575	9.04233	7.99383	5.84075	8.21332	6.75438	7.70096	5.68392	8.7995	8.48762	9.636	7.66847	6.6	7.11577	7.75444		7.66382
28_M1_pE_2_CHFD	CHFD	2	CTRL	HFD	26.03	6	male	28							-0.878647	1.62264	-1.88723	-3.17465	2.19922	-3.05766	9.29658	10.3683	6.27888	8.51649	7.38215	8.20088	6.98023	5.53026	10.1293	8.7647	8.98433	7.22347	8.23551	9.09577	7.74554	5.81026	8.16867	6.771	7.39661	5.77024	8.97265	8.52164	9.53366	7.91654	6.1602	7.08968	7.48168	4.58953	7.08865
40_M1_pE_5_CHFD	CHFD	5	CTRL	HFD	20.8	6	male	40							3.01971	-1.47036	-3.04621	-5.65175	-1.21309	3.23898	9.23941	10.3285	6.45672	8.61742	7.55674	8.54417	7.11555	5.38497	10.2024	8.73988	9.04261	7.32848	8.26368	8.96657	7.84037		8.09162	6.67928	7.58252	5.78702	9.23149	8.47201	9.58059	7.1873	6.25343	7.19565	7.64569		7.05158
49_M1_pE_3_CHFD	CHFD	3	CTRL	HFD	27.36	6	male	49							-2.37299	0.717498	-3.62774	2.03176	-3.86955	4.38721	9.22635	10.3123	6.47606	8.57243	7.59825	8.25871	6.90648	5.5865	10.2057	8.91057	9.00417	7.1945	8.33992	9.09181	7.94805	5.28654	8.03571	6.74455	7.51797	5.78717	9.01475	8.47098	9.60871	7.51031	6.27804	7.31022	7.76105		7.19138
58_M1_pE_4_CHFD	CHFD	4	CTRL	HFD	21.75	6	male	58							-13.3456	-1.85396	6.2386	-0.350082	-3.89059	0.366729	9.27366	10.3505	6.6697	8.70575	7.27716	8.51856	7.12226	5.96567	10.1584	8.88137	8.88868	7.20517	8.29164	9.05029	7.93468	5.75314	7.9892	7.0678	7.74759	5.68607	8.93568	8.49885	9.57478	7.92088	6.4244	7.44054	7.81284		7.42491
10_M1_pE_7_GRHFD	GRHFD	7	GR KO	HFD	23.63	6	male	10							-0.747141	-3.51738	-6.45467	4.51997	-2.2077	-4.84501	9.27431	10.3709	6.72562	8.72931	7.48203	8.30396	6.93704	5.21206	10.2314	8.85923	8.9874	7.15121	8.31901	9.02038	7.9395	5.53138	8.23261	6.64509	7.63182	6.25247	9.18706	8.48465	9.59226	8.03364	6.38271	7.19998	7.74334		7.66884
30_M1_pE_8_GRHFD	GRHFD	8	GR KO	HFD	20.94	6	male	30							6.53468	-4.48549	5.89392	4.71004	2.49879	1.14974	9.23222	10.3117	6.75015	8.60939	7.04269	8.52422	7.21641	5.82118	10.277	8.81103	8.87351	7.2259	8.31128	9.04288	7.84041		7.99513	6.84187	7.52586	6.37032	9.16558	8.43558	9.64943	7.56421	6.30898	7.08791	7.57317	5.00925	7.25806
39_M1_pE_11_GRHFD	GRHFD	11	GR KO	HFD	21.42	6	male	39							2.07787	6.62959	3.96855	-2.28113	-1.41121	-4.42653	9.26452	10.3359	5.444	8.49536	7.86073	8.0716	7.12232	5.52197	10.0693	8.64926	8.96398	7.32161	8.23658	9.10894	7.73094		8.15747	6.94588	6.8028	5.49978	8.88177	8.4611	9.54147	7.64706	6.01485	7.08204	7.50184		7.11505
48_M1_pE_9_GRHFD	GRHFD	9	GR KO	HFD	23.75	6	male	48							12.4661	7.25898	0.576934	1.53715	-0.861893	1.71962	9.18502	10.2682	5.59201	8.43273	7.75491	7.91732	6.98237	5.84292	10.1434	8.61796	8.74872	7.206	8.23951	9.14432	7.60679		7.79761	6.79221	6.7259	4.98822	8.82935	8.42246	9.56611	7.39887	5.84853	7.02527	7.20461		6.96416
[truncated: 148 more columns]

## Sheet: long_sample-metabolite
PeakScout_ID	Statistics	Metabolite_Name	Metabolite_Class	sample_name	LOG_Peakarea	Seq_Pos	group	mouse_ID	Genotype	Feeding	BW_terminal_g	storage_yr	age_weeks	sex	outlier	HMDB_ID	HMDB_mapping	Alternative_identity	Scan_polarity	RT_standard	precursor_mass_m-z	Peakarea	intra-group_RSD
332	MVA_UVA	Alanine	Amino acids, peptides and metabolites	01_M1_pE_Bl		1	Bl									HMDB00161	most likley		0	11.04	90.055		0.664264
332	MVA_UVA	Alanine	Amino acids, peptides and metabolites	02_M1_pE_pool_QC	7.2946	2	QC									HMDB00161	most likley		0	11.04	90.055	1.97062e+07	0.141375
332	MVA_UVA	Alanine	Amino acids, peptides and metabolites	03_M1_pE_5552_Cfed	7.54512	3	Cfed	5552	CTRL	fed	30.63	1.5	8	male		HMDB00161	most likley		0	11.04	90.055	3.5085e+07	0.232116
332	MVA_UVA	Alanine	Amino acids, peptides and metabolites	04_M1_pE_5553_GRfed	7.67056	4	GRfed	5553	GR KO	fed	31.02	1.5	8	male		HMDB00161	most likley		0	11.04	90.055	4.68341e+07	0.0973918
332	MVA_UVA	Alanine	Amino acids, peptides and metabolites	05_M1_pE_5558_C48	7.41853	5	C48	5558	CTRL	48h fast	22.26	1.5	8	male		HMDB00161	most likley		0	11.04	90.055	2.6214e+07	0.565644
332	MVA_UVA	Alanine	Amino acids, peptides and metabolites	06_M1_pE_Bl		6	Bl									HMDB00161	most likley		0	11.04	90.055		0.664264
332	MVA_UVA	Alanine	Amino acids, peptides and metabolites	07_M1_pE_pool_QC	7.3723	7	QC									HMDB00161	most likley		0	11.04	90.055	2.35669e+07	0.141375
332	MVA_UVA	Alanine	Amino acids, peptides and metabolites	08_M1_pE_5564_GR48	7.42545	8	GR48	5564	GR KO	48h fast	20.08	1.5	8	male		HMDB00161	most likley		0	11.04	90.055	2.66348e+07	0.399913
332	MVA_UVA	Alanine	Amino acids, peptides and metabolites	09_M1_pE_1_CHFD	6.71559	9	CHFD	1	CTRL	HFD	21.18	0	6	male		HMDB00161	most likley		0	11.04	90.055	5.19506e+06	0.376311
332	MVA_UVA	Alanine	Amino acids, peptides and metabolites	10_M1_pE_7_GRHFD	6.96854	10	GRHFD	7	GR KO	HFD	23.63	0	6	male		HMDB00161	most likley		0	11.04	90.055	9.30122e+06	0.268537
332	MVA_UVA	Alanine	Amino acids, peptides and metabolites	11_M1_pE_Bl	5.83889	11	Bl									HMDB00161	most likley		0	11.04	90.055	690072	0.664264
332	MVA_UVA	Alanine	Amino acids, peptides and metabolites	12_M1_pE_pool_QC	7.31957	12	QC									HMDB00161	most likley		0	11.04	90.055	2.08722e+07	0.141375
332	MVA_UVA	Alanine	Amino acids, peptides and metabolites	13_M1_pE_3186_C48	6.97839	13	C48	3186	CTRL	48h fast	25.3	0	8	male		HMDB00161	most likley		0	11.04	90.055	9.51459e+06	0.565644
332	MVA_UVA	Alanine	Amino acids, peptides and metabolites	14_M1_pE_9618_Cfed	7.81869	14	Cfed	9618	CTRL	fed	29.03	0	8	male		HMDB00161	most likley		0	11.04	90.055	6.58697e+07	0.232116
332	MVA_UVA	Alanine	Amino acids, peptides and metabolites	15_M1_pE_3189_GRfed	7.72564	15	GRfed	3189	GR KO	fed	30.3	0	8	male		HMDB00161	most likley		0	11.04	90.055	5.31669e+07	0.0973918
332	MVA_UVA	Alanine	Amino acids, peptides and metabolites	16_M1_pE_Bl	5.2342	16	Bl									HMDB00161	most likley		0	11.04	90.055	171476	0.664264
332	MVA_UVA	Alanine	Amino acids, peptides and metabolites	17_M1_pE_pool_QC	7.47964	17	QC									HMDB00161	most likley		0	11.04	90.055	3.01746e+07	0.141375
332	MVA_UVA	Alanine	Amino acids, peptides and metabolites	18_M1_pE_12_GRHFD	6.75273	18	GRHFD	12	GR KO	HFD	18.23	0	6	male	outlier	HMDB00161	most likley		0	11.04	90.055	5.65893e+06	0.268537
332	MVA_UVA	Alanine	Amino acids, peptides and metabolites	19_M1_pE_3185_GR48	7.75205	19	GR48	3185	GR KO	48h fast	25.5	0	8	male		HMDB00161	most likley		0	11.04	90.055	5.65003e+07	0.399913
332	MVA_UVA	Alanine	Amino acids, peptides and metabolites	20_M1_pE_6_CHFD	7.19707	20	CHFD	6	CTRL	HFD	21.03	0	6	male		HMDB00161	most likley		0	11.04	90.055	1.57425e+07	0.376311
332	MVA_UVA	Alanine	Amino acids, peptides and metabolites	21_M1_pE_Bl	5.30317	21	Bl									HMDB00161	most likley		0	11.04	90.055	200986	0.664264
332	MVA_UVA	Alanine	Amino acids, peptides and metabolites	22_M1_pE_pool_QC	7.34968	22	QC									HMDB00161	most likley		0	11.04	90.055	2.23705e+07	0.141375
332	MVA_UVA	Alanine	Amino acids, peptides and metabolites	23_M1_pE_5559_C48	7.25848	23	C48	5559	CTRL	48h fast	24.26	1.5	8	male		HMDB00161	most likley		0	11.04	90.055	1.81332e+07	0.565644
332	MVA_UVA	Alanine	Amino acids, peptides and metabolites	24_M1_pE_5579_GRfed	7.63354	24	GRfed	5579	GR KO	fed	26.52	1	8	male		HMDB00161	most likley		0	11.04	90.055	4.30069e+07	0.0973918
332	MVA_UVA	Alanine	Amino acids, peptides and metabolites	25_M1_pE_5583_Cfed	7.73609	25	Cfed	5583	CTRL	fed	24.58	1	8	male		HMDB00161	most likley		0	11.04	90.055	5.4462e+07	0.232116
332	MVA_UVA	Alanine	Amino acids, peptides and metabolites	26_M1_pE_Bl		26	Bl									HMDB00161	most likley		0	11.04	90.055		0.664264
332	MVA_UVA	Alanine	Amino acids, peptides and metabolites	27_M1_pE_pool_QC	7.46177	27	QC									HMDB00161	most likley		0	11.04	90.055	2.89582e+07	0.141375
332	MVA_UVA	Alanine	Amino acids, peptides and metabolites	28_M1_pE_2_CHFD	6.86528	28	CHFD	2	CTRL	HFD	26.03	0	6	male		HMDB00161	most likley		0	11.04	90.055	7.33303e+06	0.376311
332	MVA_UVA	Alanine	Amino acids, peptides and metabolites	29_M1_pE_5589_GR48	7.51549	29	GR48	5589	GR KO	48h fast	19.53	1	8	male		HMDB00161	most likley		0	11.04	90.055	3.27714e+07	0.399913
332	MVA_UVA	Alanine	Amino acids, peptides and metabolites	30_M1_pE_8_GRHFD	6.89114	30	GRHFD	8	GR KO	HFD	20.94	0	6	male		HMDB00161	most likley		0	11.04	90.055	7.78285e+06	0.268537
332	MVA_UVA	Alanine	Amino acids, peptides and metabolites	31_M1_pE_Bl		31	Bl									HMDB00161	most likley		0	11.04	90.055		0.664264
332	MVA_UVA	Alanine	Amino acids, peptides and metabolites	32_M1_pE_pool_QC	7.46625	32	QC									HMDB00161	most likley		0	11.04	90.055	2.92585e+07	0.141375
332	MVA_UVA	Alanine	Amino acids, peptides and metabolites	33_M1_pE_3187_GRfed	7.62781	33	GRfed	3187	GR KO	fed	33.3	0	8	male		HMDB00161	most likley		0	11.04	90.055	4.2443e+07	0.0973918
332	MVA_UVA	Alanine	Amino acids, peptides and metabolites	34_M1_pE_3188_Cfed	7.78985	34	Cfed	3188	CTRL	fed	28.8	0	8	male		HMDB00161	most likley		0	11.04	90.055	6.16384e+07	0.232116
332	MVA_UVA	Alanine	Amino acids, peptides and metabolites	35_M1_pE_9114_C48	7.59379	35	C48	9114	CTRL	48h fast	25.8	0	8	male		HMDB00161	most likley		0	11.04	90.055	3.92458e+07	0.565644
332	MVA_UVA	Alanine	Amino acids, peptides and metabolites	36_M1_pE_Bl	5.03217	36	Bl									HMDB00161	most likley		0	11.04	90.055	107689	0.664264
332	MVA_UVA	Alanine	Amino acids, peptides and metabolites	37_M1_pE_pool_QC	7.35714	37	QC									HMDB00161	most likley		0	11.04	90.055	2.27581e+07	0.141375
332	MVA_UVA	Alanine	Amino acids, peptides and metabolites	38_M1_pE_3184_GR48	7.60303	38	GR48	3184	GR KO	48h fast	22.48	0	8	male		HMDB00161	most likley		0	11.04	90.055	4.00893e+07	0.399913
332	MVA_UVA	Alanine	Amino acids, peptides and metabolites	39_M1_pE_11_GRHFD	6.75447	39	GRHFD	11	GR KO	HFD	21.42	0	6	male		HMDB00161	most likley		0	11.04	90.055	5.68164e+06	0.268537
332	MVA_UVA	Alanine	Amino acids, peptides and metabolites	40_M1_pE_5_CHFD	7.09593	40	CHFD	5	CTRL	HFD	20.8	0	6	male		HMDB00161	most likley		0	11.04	90.055	1.24718e+07	0.376311
332	MVA_UVA	Alanine	Amino acids, peptides and metabolites	41_M1_pE_Bl	5.84491	41	Bl									HMDB00161	most likley		0	11.04	90.055	699690	0.664264
332	MVA_UVA	Alanine	Amino acids, peptides and metabolites	42_M1_pE_pool_QC	7.40682	42	QC									HMDB00161	most likley		0	11.04	90.055	2.55163e+07	0.141375
332	MVA_UVA	Alanine	Amino acids, peptides and metabolites	43_M1_pE_5584_GRfed	7.66206	43	GRfed	5584	GR KO	fed	26.76	1	8	male		HMDB00161	most likley		0	11.04	90.055	4.5926e+07	0.0973918
332	MVA_UVA	Alanine	Amino acids, peptides and metabolites	44_M1_pE_5563_C48	7.02887	44	C48	5563	CTRL	48h fast	21.48	1.5	8	male		HMDB00161	most likley		0	11.04	90.055	1.06873e+07	0.565644
332	MVA_UVA	Alanine	Amino acids, peptides and metabolites	45_M1_pE_5587_Cfed	7.61036	45	Cfed	5587	CTRL	fed	28.32	1	8	male		HMDB00161	most likley		0	11.04	90.055	4.07722e+07	0.232116
332	MVA_UVA	Alanine	Amino acids, peptides and metabolites	46_M1_pE_Bl	5.92686	46	Bl									HMDB00161	most likley		0	11.04	90.055	845011	0.664264
332	MVA_UVA	Alanine	Amino acids, peptides and metabolites	47_M1_pE_pool_QC	7.48874	47	QC									HMDB00161	most likley		0	11.04	90.055	3.08132e+07	0.141375
332	MVA_UVA	Alanine	Amino acids, peptides and metabolites	48_M1_pE_9_GRHFD	6.63653	48	GRHFD	9	GR KO	HFD	23.75	0	6	male		HMDB00161	most likley		0	11.04	90.055	4.33043e+06	0.268537
332	MVA_UVA	Alanine	Amino acids, peptides and metabolites	49_M1_pE_3_CHFD	7.17565	49	CHFD	3	CTRL	HFD	27.36	0	6	male		HMDB00161	most likley		0	11.04	90.055	1.49849e+07	0.376311
332	MVA_UVA	Alanine	Amino acids, peptides and metabolites	50_M1_pE_5591_GR48	7.23101	50	GR48	5591	GR KO	48h fast	20.93	1	8	male		HMDB00161	most likley		0	11.04	90.055	1.70218e+07	0.399913
332	MVA_UVA	Alanine	Amino acids, peptides and metabolites	51_M1_pE_Bl		51	Bl									HMDB00161	most likley		0	11.04	90.055		0.664264
332	MVA_UVA	Alanine	Amino acids, peptides and metabolites	52_M1_pE_pool_QC	7.41264	52	QC									HMDB00161	most likley		0	11.04	90.055	2.58607e+07	0.141375
332	MVA_UVA	Alanine	Amino acids, peptides and metabolites	53_M1_pE_5588_Cfed	7.6939	53	Cfed	5588	CTRL	fed	26.18	1	8	male	outlier	HMDB00161	most likley		0	11.04	90.055	4.94192e+07	0.232116
332	MVA_UVA	Alanine	Amino acids, peptides and metabolites	54_M1_pE_9112_C48	7.68848	54	C48	9112	CTRL	48h fast	22.66	0	8	male	outlier	HMDB00161	most likley		0	11.04	90.055	4.88071e+07	0.565644
332	MVA_UVA	Alanine	Amino acids, peptides and metabolites	55_M1_pE_5586_GRfed	7.61432	55	GRfed	5586	GR KO	fed	24.76	1	8	male	outlier	HMDB00161	most likley		0	11.04	90.055	4.11453e+07	0.0973918
332	MVA_UVA	Alanine	Amino acids, peptides and metabolites	56_M1_pE_Bl	6.00897	56	Bl									HMDB00161	most likley		0	11.04	90.055	1.02087e+06	0.664264
332	MVA_UVA	Alanine	Amino acids, peptides and metabolites	57_M1_pE_pool_QC	7.36719	57	QC									HMDB00161	most likley		0	11.04	90.055	2.32914e+07	0.141375
332	MVA_UVA	Alanine	Amino acids, peptides and metabolites	58_M1_pE_4_CHFD	7.16187	58	CHFD	4	CTRL	HFD	21.75	0	6	male		HMDB00161	most likley		0	11.04	90.055	1.45168e+07	0.376311
332	MVA_UVA	Alanine	Amino acids, peptides and metabolites	59_M1_pE_10_GRHFD	6.86775	59	GRHFD	10	GR KO	HFD	21.75	0	6	male	outlier	HMDB00161	most likley		0	11.04	90.055	7.37473e+06	0.268537
332	MVA_UVA	Alanine	Amino acids, peptides and metabolites	60_M1_pE_3183_GR48	7.71005	60	GR48	3183	GR KO	48h fast	22.7	0	8	male	outlier	HMDB00161	most likley		0	11.04	90.055	5.12918e+07	0.399913
332	MVA_UVA	Alanine	Amino acids, peptides and metabolites	61_M1_pE_Bl		61	Bl									HMDB00161	most likley		0	11.04	90.055		0.664264
332	MVA_UVA	Alanine	Amino acids, peptides and metabolites	62_M1_pE_pool_QC	7.37788	62	QC									HMDB00161	most likley		0	11.04	90.055	2.38716e+07	0.141375
332	MVA_UVA	Alanine	Amino acids, peptides and metabolites	63_M1_pE_HepBlank_HepBlnk	5.8128	63	HepBlnk									HMDB00161	most likley		0	11.04	90.055	649836
332	MVA_UVA	Alanine	Amino acids, peptides and metabolites	64_M1_pE_9110_C48	7.61176	64	C48	9110	CTRL	48h fast	22.5	0	8	male		HMDB00161	most likley		0	11.04	90.055	4.09033e+07	0.565644
332	MVA_UVA	Alanine	Amino acids, peptides and metabolites	65_M1_pE_5585_GRfed	7.61006	65	GRfed	5585	GR KO	fed	27.68	1	8	male		HMDB00161	most likley		0	11.04	90.055	4.07432e+07	0.0973918
332	MVA_UVA	Alanine	Amino acids, peptides and metabolites	66_M1_pE_Bl	5.60168	66	Bl									HMDB00161	most likley		0	11.04	90.055	399651	0.664264
332	MVA_UVA	Alanine	Amino acids, peptides and metabolites	67_M1_pE_pool_QC	7.36257	67	QC									HMDB00161	most likley		0	11.04	90.055	2.30445e+07	0.141375
Please find the full version of the table at <Link will be provided after publication acceptance> or <Link will be provided after publication acceptance>.

## Sheet: Table legend
table_name	content_structure
long_sample-metabolite	The "long" table is structured with one row per metabolite AND sample (incl. blanks, QCs). This table is most suitable for data explorations and single metabolite scatter or box plots. The table also contains selected metabolite information and the most important sample information.
per-sample	The " wide" table contains the same values as the long data set, but is structured with one row per sample and one colum per metabolite (LOG_Peakarea). This table is best suitable for metabolite versus metabolite plots, correlation calculations and plotting of sample specific multivariate statistical results (i.e. PCA scores). Blanks, QCs and Outlier Samples have been removed for the sake of clar…
per-metabolite	The table is structured with one row per metabolite, not containing unaggregated measurement values anymore. This metabolite data set is best suitable for adding and plotting statistical results from multivariate (i.e. PCA loadings) and univariate (i.e. ANOVA) analysis. All available metabolie information are contained.
column_name	content_description	data_type	part of table
			long_sample-metabolite	per-sample	per-metabolite
Statistics	quality of the metabolite categorized as suitable for MVA_UVA (best) or suitable for UVA only (plot metabolite before interpretation)	string	yes	in metabolite column name	yes
Metabolite_name	name of the measured and identified metabolite	string	yes	in metabolite column name	yes
Metabolite_Class	The metabolite classes serve as a first orientation and were choosen by experience+literature.	string	yes	no	yes
Sample_Name	sample specific, unique name	string	yes	yes	no
Seq_Pos	Sequence in which samples were measured	integer	yes	yes	no
mouse_ID	number identifying a specific mouse	integer	yes	yes	no
group	biological group of the sample, bl = blank, QC = pooled quality control, C = control mice, GR = Adipocyte-specific GR-deficient mice, 48 = 48h fasted, fed = fed ad libitum with standard chow, HFD = high fat diet	string	yes	yes	no
PeakScout_ID	unique identifier of metabolite	string	yes	in metabolite column name	yes
LOG_Peakarea	Log10 of Peakarea (log10 improves values distribution towards normal distrbution, necessary because metabolite values are often right skewed), USE THIS FOR ANY CALCULATIONS&ANALYSIS!	real	yes	as metabolite columns	no
HMDB_ID	identifier connecting to the Human Metabolome Database (HMDB , http://www.hmdb.ca/) assigned manually, non-validated	string	yes	no	yes
HMDB_mapping	mapping type of HMDB_ID: "most likley" the ID was selcted by biological liklehood to occur in the sample type, "exemplaric" in cases with too many matches an exemplaric one was selected	string	yes	no	yes
Peakarea	integrated area under an identified peak, i.e. the measurement value	real	yes	no	no
intra-group_RSD	relative standard deviation of the metabolite within the relative group (according to entries in column group)	real	yes	no	no
Color coding	Table: long_sample-metabolite, per-metabolite
cut off MVA	Metabolites with values below cut-off are MVA_UVA suitable, with values above cut-off but below next cut-off are only UVA suitable
cut off exclusion	Metabolites with values above cut-off are not suitable for analysis at all and are not provided in results table
Color coding	Table: per-metabolite
p<0.1	indicative of a trend, can be used for interpretation if biologically connected metabolites show same trend
p<0.05	classical significance level
p<0.01	highly significant
ratio<0,95 AND p<0,05	non-adjusted p value used for coloring, numbers in bold when 0,8 < ratio > 1,2 (equals more than 20% metabolite level change)
ratio<0,95 AND p<0,01	non-adjusted p value used for coloring, numbers in bold when 0,8 < ratio > 1,2 (equals more than 20% metabolite level change)
ratio>1,05 AND p<0,05	non-adjusted p value used for coloring, numbers in bold when 0,8 < ratio > 1,2 (equals more than 20% metabolite level change)
ratio>1,05 AND p<0,01	non-adjusted p value used for coloring, numbers in bold when 0,8 < ratio > 1,2 (equals more than 20% metabolite level change)
Color coding	Table: long_sample-metabolite, per-metabolite
The metabolite classes serve as a first orientation and were assigned by experience or literature. In case of ambiguities fragmentation spectra were manually rechecked to ensure correct metabolite identification (identification error rate estimated to be below 2% for metabolites and below 15% for lipids).			Carbohydrates and conjugates
			Energy metabolism
			Nucleotides and metabolites
			Fatty acids and metabolites
			Lipids, steroids, bile acids and metabolites
			Others
			Pharmaceuticals, Xenobiotics
			Vitamins, Coenzymes, Cofactors
